# Supplementary material for: Comparative omics and feeding manipulations in chicken indicate a shift of the endocrine role of visceral fat towards reproduction
Source: BMC Genomics. 2018 Apr 26;19:295. doi: 10.1186/s12864-018-4675-0 (PMC5922311; doi:10.1186/s12864-018-4675-0)
Supplement: Supplementary file 2 — Table S4. The primers used for the qPCR analyses. Excel Worksheet xlsm 12 KB. (XLSX 11 kb) [file 12864_2018_4675_MOESM2_ESM.xlsx]

## Sheet: Table S4
Additional file 2: Table S4. Primers used for the qPCR analyses.
	Forward Primer		Reverse Primer		Amplicon size
Adipolin	GTG TAG AGG AGG CGT TCC AC		CCG CAG AAA AGC TCC TTT GG		113 bp
ADIPOQ	GAG CCA GGT CTA CAA GGT GTC AA		GCC CCT TCA TCC CCA TGT		132 bp
ANGPT1	GGC GTA CGG ATG GCT CTG T		CAC CAT GAA GGT CTC CAA AGC		75 bp
APLN	CTG TGA GCT GCC CTG TGG		TGA CAG ACA CGG TGA CCA G		108 bp
CFD	TCT CGT GTC TGC GGC AAC TA		ACC ATC AAT CCA CTC AGC ATA GG		75 bp
IFNG	AGCCGCGAATGAACTCTTCA		TCTCCTCTGAGACTGGCTCCTT		85 bp
IL6	GAAATCCCTCCTCGCCAATC		CGAAGTAAAGTCTCGGAGGATGA		85 bp
LCAT	ACT GGA TGT GCT ACC GCA AA		TTC GGT TGT ACA CGA CCC TG		117 bp
LECT	TAT GCT CCC TTT TCT GGT GAG C		CAC AGA AGC CTG ATC CCC TG		100 bp
LEP	GGC GAT TCC AAC GCC TAC T		CCG CCA TGG CTT GCA		102 bp
NAMPT	TCGGATACCACGACTGAACA		TTCCAGAGGGCTCTGTCATT		119 bp
RBP4	GGG CTG TTT CTA CAG GAC AAT GT		CTT TGC AGT GGC ACT CAT CTG		75 bp
SERPINE2	TAGGCAGTCGCAGAAAAGCA		GAAAGCACCCGGGAATACAA		100 bp
SFTPA1	TTGGAAGTCTGGAGCCACTTG		TCGTGAAAGCTGCTGTGCTT		100 bp
TNF	TCGTGGCATCGTCCTCTCAG		ACC AAT TTG TTC CTT CTC AGC AC		100bp
ZP1	GCCTCCTACGAGGTGAACATG		GCCGTGCACCTTCTCATCTC		75 bp
ZP3	GCTGGGCGACATCCTCAA		AGCCACACAGCTGTCCACAA		85 bp
