# Supplementary material for: Comparative omics and feeding manipulations in chicken indicate a shift of the endocrine role of visceral fat towards reproduction
Source: BMC Genomics. 2018 Apr 26;19:295. doi: 10.1186/s12864-018-4675-0 (PMC5922311; doi:10.1186/s12864-018-4675-0)
Supplement: Supplementary file 3 — MS data. Table S5. Proteins identified by MS in visceral fat of broiler and layer females at the onset of sexual maturation (422 proteins). Table S6. A. List of enriched pathways obtained using Ingenuity software and the MS differential proteins (P ≤ 0.05). B. List of proteins involved in the Intrinsic Prothrombin Activation Pathway: details on their expression at the protein and mRNA levels. Excel Worksheet xlsm 216 KB. (XLSX 142 kb) [file 12864_2018_4675_MOESM3_ESM.xlsx]

## Sheet:  Table 5
Additional file 3: Table S5. Proteins identified by Mass apectrometry in visceral fat of broile and layer femals at the onset of sexual maturation
Diferential proteins (P ≤ 0.05) with matching identification by RNA-seq (196 proteins)						Spec analysisMass														RNA=seq analysis
Protein GI	Genbank Accession	Chicken symbol	Human symbol	GeneID (human)	Protein Description	Broiler B7 Normalized Intensity	Broiler B6 Normalized Intensity	Broiler B5 Normalized Intensity	Mean Broilers	Layer L2 Normalized Intensity	Layer L4 Normalized Intensity	Layer L1 Normalized Intensity	Mean Layers	Ratio (B/L)	P-value	Direction in Broilers	Ratio Broilers / Layers	Log2 fold change		Mean Broiler (FPKM)	Mean Layer (FPKM)	Ratio (B/L)	P-value	Log2 fold change		Correlation between B:L log 2 fold change
71894831	NP_001026234.1	ACTA1	ACTA1	58	actin, alpha skeletal muscle	0.119931	0.0992573	0.140847	0.120012	0.213039	0.245042	0.215202	0.224427	0.534746	0.042104	down	0.534762	-0.90303		20.2888	27.9068	0.727019	0.32337	-0.459935
118405200	NP_001072949.1	ACTC1	ACTC1	70	actin, alpha cardiac muscle 1	0.116869	0.096723	0.137207	0.116933	0.2075	0.238688	0.209616	0.218601	0.534914	0.041874	down	0.534931	-0.902577		0.559245	0.566506	0.987182	0.990186	-0.018612
45382569	NP_990555.1	ACTR2	ACTR2	10097	actin-related protein 2	0	0	0	0	0.0729972	0	0.126371	0.0664561	0	0.00941399	down	0.000115666	-13.0778		90.8369	92.7128	0.979766	0.9636	-0.0294903
513204649	XP_004944529.1	ACY1	ACY1	95	aminoacylase-1	0	0	0	0	0	0.0682019	0.0597412	0.0426477	0	0.002417	down	0.000180225	-12.4379		16.2696	14.6051	1.11397	0.842154	0.155711
57529377	NP_001006290.1	ADA	ADA	100	adenosine deaminase	0	0	0	0	0.0368855	0	0.0317517	0.0228791	0	0.002785	down	0.000335896	-11.5397		30.1611	39.8388	0.757079	0.310652	-0.401485
45383900	NP_989434.1	ADD3	ADD3	120	gamma-adducin	0	0	0	0	0	0.0374043	0.0326675	0.0233573	0	0.002663	down	0.000329022	-11.5695		72.0501	60.8743	1.18359	0.729151	0.243165
46195854	NP_996874.1	ADIPOQ	ADIPOQ	9370	adiponectin precursor	0.0297366	0	0.0349205	0.0215524	0	0	0	0	2804.53	0.00292	up	2804.53	11.4535		163.336	148.116	1.10275	0.868751	0.14111		-0.027723
513190195	XP_001235680.3	ADSSL1	ADSSL1	122622	adenylosuccinate synthetase isozyme 1 A, partial	0	0	0	0	0.0372644	0.0367534	0	0.0246726	0	0.001409	down	0.000311486	-11.6485		42.1895	43.7049	0.965328	0.9345	-0.0509084
513237884	XP_004950547.1	AHNAK	AHNAK	79026	neuroblast differentiation-associated protein AHNAK-like, partial	0.0311922	0	0.0366305	0.0226076	0	0	0	0	2941.79	0.002932	up	2941.79	11.5225		138.305	190.087	0.727585	0.339973	-0.458811
513190198	XP_003641486.2	AHNAK2	AHNAK2	113146	protein AHNAK2	0	0.0692735	0.0368566	0.0353767	0	0	0	0	4602.8	0.012573	up	4602.8	12.1683		45.8142	48.4711	0.945186	0.90818	-0.0813302
57529654	NP_001006539.1	AKR1A1	AKR1A1	10327	alcohol dehydrogenase [NADP()]	0	0	0	0	0	0.03621	0.031618	0.0226094	0	0.002669	down	0.000339902	-11.5226		45.742	34.8262	1.31344	0.338882	0.393347
363745122	XP_003643198.1	AKR1B10	AKR1B10	57016	aldose reductase-like	0	0	0	0	0.108206	0.0355495	0.124843	0.089533	0	0.00038	down	8.58557e-05	-13.5077		343.939	299.755	1.1474	0.812333	0.198368
482845617	NP_001264828.1	AKR1B1L	AKR1B1	231	aldo-keto reductase family 1, member B10 (aldose reductase)	0	0	0	0	0.106407	0.0349577	0.122781	0.0880486	0	0.000417	down	8.7303e-05	-13.4836		22.6852	15.0523	1.50709	0.0587299	0.591762
45384056	NP_990483.1	ALB	ALB	213	ovalbumin precursor	0	0	0	0	0.0354231	0	0.0304991	0.021974	0	0.002823	down	0.000349726	-11.4815		83.7804	277.97	0.3014	1.80978e-06	-1.73025
157951672	NP_001007978.1	ALDOB	ALDOB	229	fructose-bisphosphate aldolase B	0	0	0	0	0.0353762	0	0.0304584	0.0219449	0	0.002884	down	0.00035019	-11.4796		31.8538	80.87	0.393889	5.04541e-05	-1.34414
56118294	NP_001007943.1	ANG	ANG	283	ribonuclease homolog precursor	0	0	0	0	0	0.0373813	0.0326472	0.0233428	0	0.002626	down	0.000329225	-11.5686		118.954	207.061	0.574489	0.233762	-0.799649
45382533	NP_990682.1	ANXA2	ANXA2	302	annexin A2	0.0893794	0.131514	0.139961	0.120285	0.0704963	0	0.0608979	0.0437981	2.74635	0.00971599	up	2.74604	1.45735		1196.49	1033.03	1.15823	0.838951	0.211922
309951118	NP_001006317.2	APLP2	APLP2	334	amyloid-like protein 2 precursor	0	0	0	0	0	0.0700545	0.0921682	0.0540742	0	0.004353	down	0.000142147	-12.7803		212.745	219.984	0.967097	0.949342	-0.0482675
113206052	NP_001038098.1	APOB	APOB	338	apolipoprotein B precursor	0.0585823	0.0646436	0.275231	0.132819	0	0	0	0	17278.1	0.013059	up	17278.1	14.0767		3.20303	16.6086	0.192854	3.3175e-14	-2.37442
45383530	NP_989639.1	APP	APP	351	amyloid beta A4 protein precursor	0	0	0	0	0.0685546	0	0.0294856	0.0326801	0	0.018973	down	0.000235182	-12.0539		383.382	358.364	1.06981	0.932272	0.0973576
118405190	NP_001072967.1	ARCN1	ARCN1	372	coatomer subunit delta	0	0	0.0371121	0.0123707	0.0373722	0.0368596	0.0321883	0.0354733	0.348733	0.003346	down	0.348874	-1.51922		79.5805	73.3545	1.08488	0.883564	0.11753
124249432	NP_001074340.1	ARHGDIA	ARHGDIA	396	rho GDP-dissociation inhibitor 1	0	0	0	0	0.0350051	0.0345259	0.0301368	0.0332226	0	9.99999e-07	down	0.000231342	-12.0777		197.099	201.366	0.978813	0.962943	-0.0308944
57530079	NP_001006453.1	ASAH1	ASAH1	427	acid ceramidase precursor	0	0	0	0	0.0361548	0.0356593	0	0.023938	0	0.001406	down	0.000321042	-11.605		89.2325	73.4053	1.21561	0.706154	0.281686
61657937	NP_001013413.1	ASS1	ASS1	445	argininosuccinate synthase	0	0	0	0	0.0373728	0.0368602	0	0.0247444	0	0.001409	down	0.000310584	-11.6527		84.6632	99.7883	0.848428	0.710833	-0.237136
363745506	XP_429118.3	ATP5A1	ATP5A1	498	ATP synthase subunit alpha, mitochondrial	0.094427	0.0694635	0.0369566	0.066949	0.0372161	0	0	0.0124054	5.39678	0.00543099	up	5.39406	2.43137		163.176	173.282	0.941681	0.896393	-0.0866896
513200587	XP_004943685.1	B2M	B2M	567	beta-2-microglobulin	0	0	0	0	0	0.112212	0.164212	0.0921414	0	0.00563899	down	8.34254e-05	-13.5492		2382.71	2311.34	1.03088	0.978006	0.0438736
45383940	NP_990533.1	B4GALT1	B4GALT1	2683	beta-1,4-galactosyltransferase 1	0	0	0	0	0.0723355	0	0.0311318	0.0344891	0	0.01896	down	0.000222849	-12.1316		35.9119	29.5107	1.21691	0.524828	0.283228
45383878	NP_989447.1	BASP1	BASP1	10409	brain acid soluble protein 1 homolog	0	0	0	0	0.0360233	0.0355297	0.0310192	0.0341907	0	9.99999e-07	down	0.000224793	-12.1191		61.4722	66.0964	0.930038	0.896393	-0.104639
513165569	XP_004938797.1	C4A	C4A	720	complement C4-A	0	0.0346461	0.0368753	0.0238405	0.334707	0.14665	0.0964784	0.192612	0.123775	0.010852	down	0.12381	-3.0138		8.31794	7.7326	1.0757	0.908507	0.105273
46048696	NP_990648.1	CA2	CA2	760	carbonic anhydrase 2	0	0	0	0	0.113303	0	0.130744	0.081349	0	0.002234	down	9.44922e-05	-13.3694		43.8905	35.5208	1.23563	0.679756	0.305241
160358333	NP_001103834.1	CALM1	CALM1	801	neo-calmodulin	0	0	0	0	0.0708541	0.0698692	0	0.0469078	0	0.001262	down	0.00016386	-12.5752		614.399	573.039	1.07218	0.940213	0.100544
363741091	XP_415780.3	CCL26	CCL26	6348	chemokine	0	0	0	0	0.0360705	0.0355763	0.0310602	0.0342357	0	9.99999e-07	down	0.000224498	-12.121		102.023	149.356	0.683082	0.399842	-0.549869
71897077	NP_001025883.1	CCL3	CCL3	6348	C-C motif chemokine 3	0	0	0	0	0.0374794	0.0369653	0	0.0248149	0	0.001352	down	0.000309701	-11.6568		127.445	52.0082	2.45048	0.00324132	1.29307
253970461	NP_990191.2	CD44	CD44	960	CD44 antigen precursor	0	0	0	0	0	0.0374456	0.0327037	0.0233831	0	0.002618	down	0.000328658	-11.5711		23.7892	21.4784	1.10759	0.888985	0.147422
310772242	NP_001185580.1	CD99	CD99	4267	CD99 antigen precursor	0	0	0	0	0.0346952	0.0342204	0.0298682	0.0329279	0	9.99999e-07	down	0.000233412	-12.0648		402.436	359.961	1.118	0.865534	0.160919
45383674	NP_989558.1	CDH5	CDH5	1003	cadherin-5 precursor	0	0	0	0	0.111245	0.0365417	0.0640621	0.0706163	0	0.002025	down	0.000108852	-13.1653		103.928	138.964	0.747876	0.36136	-0.419129
513227300	XP_003642908.2	CFD	CFD	1675	complement factor D-like	0	0	0	0	0.0377342	0.0372165	0.0652467	0.0467325	0	0.000495	down	0.000164475	-12.5698		509.028	897.292	0.567294	0.0484599	-0.817831
513159594	XP_416309.4	CKAP4	CKAP4	10970	cytoskeleton-associated protein 4, partial	0	0.0706244	0.112749	0.0611244	0	0	0	0	7952.07	0.00784599	up	7952.07	12.9571		96.4186	80.5481	1.19703	0.717484	0.259461
71895359	NP_001026285.1	CLIC2	CLIC2	1193	chloride intracellular channel protein 2	0	0	0	0	0.0374959	0	0.032296	0.023264	0	0.002835	down	0.000330341	-11.5638		79.338	96.5303	0.821897	0.512375	-0.28297
45382467	NP_990231.1	CLUL1	CLU	1191	clusterin precursor	0	0	0	0	0.0360463	0.0355524	0.0936033	0.0550674	0	0.004188	down	0.000139584	-12.8066		0.0127728	0.0360342	0.354464		-1.49629
71896025	NP_001026735.1	CMPK	CMPK1	51727	UMP-CMP kinase	0	0	0	0	0.0364523	0.0719371	0	0.0361298	0	0.01353	down	0.000212731	-12.1987		34.9108	37.7062	0.925864	0.833678	-0.111128
57530409	NP_001006385.1	CNDP2	CNDP2	55748	cytosolic non-specific dipeptidase	0	0	0	0	0.0377571	0	0.0652875	0.0343482	0	0.010291	down	0.000223763	-12.1257		71.6087	77.8891	0.919367	0.930107	-0.121287
513198610	XP_422326.3	CNN3	CNN3	1266	calponin-3, partial	0	0	0	0	0.0719602	0	0.0309614	0.0343072	0	0.018437	down	0.00022403	-12.124		382.581	377.416	1.01369	0.994057	0.0196102
45384318	NP_990352.1	COL12A1	COL12A1	1303	collagen alpha-1(XII) chain precursor	0.0314717	0	0.147873	0.0597814	0.559151	0.220527	0.258239	0.345973	0.172792	0.00946999	down	0.172811	-2.53274		30.7152	24.0393	1.27771	0.860196	0.353558
45383788	NP_989495.1	COL18A1	COL18A1	80781	collagen, type XVIII, alpha 1 precursor	0.0583258	0.0321724	0.0684968	0.0529983	0	0	0.0596062	0.0198687	2.66742	0.019003	up	2.66678	1.4151		40.1829	51.1179	0.786083	0.417204	-0.347246
513235244	XP_423116.4	COL1A1	COL1A1	1277	collagen alpha-1(I) chain, partial	0	0	0	0	0.142772	0.0351699	0.0616484	0.0798636	0	0.00579899	down	9.62496e-05	-13.3429		1750.86	1487.64	1.17694	0.910743	0.235037
206597434	NP_001073182.2	COL1A2	COL1A2	1278	collagen alpha-2(I) chain precursor	0	0	0	0	0.821542	0.736269	0.614655	0.724155	0	9.99999e-07	down	1.06158e-05	-16.5234		990.823	645.281	1.53549	0.674833	0.6187
45383309	NP_989757.1	COL2A1	COL2A1	1280	collagen alpha-1(II) chain precursor	0	0	0	0	0.150197	0	0.0648653	0.0716875	0	0.016488	down	0.000107226	-13.1871		16.6223	13.8316	1.20176	0.898609	0.265154
206597436	NP_990711.2	COL3A1	COL3A1	1281	collagen alpha-1(III) chain precursor	0	0	0.0728828	0.0242943	0.477642	0.253555	0.286342	0.339179	0.0716266	0.000903999	down	0.0716476	-3.80294		2001.01	1271.21	1.5741	0.598612	0.654529
240848597	NP_001155871.1	COL4A1	COL4A1	1282	collagen alpha-1(IV) chain precursor	0	0	0	0	0	0.0701714	0.0923294	0.0541669	0	0.00439	down	0.000141904	-12.7828		216.614	326.687	0.663062	0.25556	-0.592784
240849597	NP_001155862.1	COL4A2	COL4A2	1284	collagen, type IV, alpha 2 precursor	0	0	0	0	0.105715	0	0.030312	0.0453422	0	0.029715	down	0.000169517	-12.5263		118.213	161.559	0.7317	0.343587	-0.450676
46048885	NP_990121.1	COL5A1	COL5A1	1289	collagen alpha-1(V) chain precursor	0	0	0	0	0.0700994	0.034547	0.12135	0.0753321	0	0.002473	down	0.000102039	-13.2586		72.4099	60.0937	1.20495	0.830241	0.268973
363735738	XP_421846.3	COL5A2	COL5A2	1290	collagen alpha-2(V) chain	0	0	0	0	0.114002	0.11241	0.131551	0.119321	0	9.99999e-07	down	6.44236e-05	-13.9221		112.152	81.9832	1.36798	0.609832	0.45205
49225581	NP_990438.1	COL6A1	COL6A1	1291	collagen alpha-1(VI) chain precursor	0	0.032003	0.102211	0.044738	0.34342	0.067691	0.237903	0.216338	0.206796	0.012981	down	0.206825	-2.27352		689.966	456.411	1.51172	0.458314	0.596192
45384382	NP_990679.1	COL6A2	COL6A2	1292	collagen alpha-2(VI) chain precursor	0	0	0	0	0.260562	0.146784	0.322446	0.243264	0	0.000117	down	3.16007e-05	-14.9497		600.884	447.099	1.34396	0.652501	0.426492
118103279	XP_418238.2	COMP	COMP	1311	cartilage oligomeric matrix protein	0	0	0	0	0.177298	0.0349366	0	0.0707449	0	0.037474	down	0.000108654	-13.168		276.339	99.182	2.78618	0.168632	1.47829
319655747	NP_990831.2	CST3	CST3	1471	cystatin precursor	0	0	0	0	0.0363258	0.107549	0.0312814	0.0583854	0	0.00776699	down	0.000131652	-12.891		530.286	323.842	1.63748	0.257374	0.711481
363728309	XP_416493.3	CSTA	CSTA	1475	leukocyte cysteine proteinase inhibitor 1	0	0	0	0	0	0.0375959	0.0989924	0.0455294	0	0.021806	down	0.00016882	-12.5322		195.622	159.716	1.22481	0.916942	0.292561
513179626	XP_004935959.1	CTSB	CTSB	1508	cathepsin B	0	0	0	0	0.0761115	0.0750715	0.329856	0.160346	0	0.011767	down	4.79413e-05	-14.3484		776.609	635.424	1.22219	0.81167	0.289469
45384002	NP_990508.1	CTSD	CTSD	1509	cathepsin D precursor	0	0	0	0	0.175496	0.0345728	0.151899	0.120656	0	0.000625999	down	6.37107e-05	-13.9381		160.697	306.988	0.523464	0.303789	-0.933837
45382633	NP_990799.1	CTTN	CTTN	2017	src substrate protein p85 precursor	0	0	0	0	0.0378824	0.03738	0	0.0250874	0	0.001427	down	0.000306337	-11.6726		58.4379	58.2869	1.00259	0.992986	0.00373346
118405198	NP_001072946.1	CYCS	CYCS	54205	cytochrome c	0	0	0	0	0.0345617	0.0340887	0.0297525	0.032801	0	9.99999e-07	down	0.000234315	-12.0593		232.926	245.318	0.949486	0.902957	-0.0747814
147902704	NP_001091009.1	DAG1	DAG1	1605	dystroglycan precursor	0	0	0	0	0.0374289	0	0.032238	0.0232223	0	0.00288	down	0.000330933	-11.5612		74.9164	89.9429	0.832933	0.554124	-0.263728
45382201	NP_990133.1	DCTN2	DCTN2	10540	dynactin subunit 2	0	0	0	0	0.0361307	0.0356356	0	0.0239221	0	0.001411	down	0.000321256	-11.604		35.5791	32.8581	1.08281	0.884454	0.114783
45383177	NP_989825.1	DPYSL2	DPYSL2	1808	dihydropyrimidinase-related protein 2	0	0	0	0	0.0371535	0	0.0642413	0.0337983	0	0.010497	down	0.000227403	-12.1025		98.4039	89.9062	1.09452	0.886858	0.130295
74048411	NP_001027570.1	EEF1A2	EEF1A2	1917	eukaryotic translation elongation factor 1 alpha 2	0	0	0	0	0.0354026	0	0.0612057	0.0322028	0	0.010339	down	0.000238667	-12.0327		4.93737	8.17855	0.603698	0.14092	-0.728102
57529969	NP_001006477.1	EIF2S1	EIF2S1	1965	eukaryotic translation initiation factor 2 subunit 1	0	0	0	0	0.0360699	0.0355751	0	0.0238817	0	0.001407	down	0.000321799	-11.6016		71.1391	65.2446	1.09034	0.854069	0.124784
513172720	XP_419145.4	EMILIN2	EMILIN2	84034	EMILIN-2	0	0	0	0	0.0366056	0.0722732	0.0633214	0.0574001	0	6.49999e-05	down	0.000133912	-12.8664		71.2944	59.2268	1.20375	0.810108	0.267538
46048768	NP_990451.1	ENO1	ENO1	2023	alpha-enolase	0.03187	0	0.0374261	0.0230987	0.150901	0.111581	0.130582	0.131021	0.176297	0.000518999	down	0.176346	-2.50352		502.87	502.583	1.00057	0.992926	0.000824792
269784808	NP_001161476.1	EPB41	EPB41	2035	erythroid protein 4.1	0.0308805	0.0340717	0.0725401	0.0458308	0	0	0	0	5962.67	0.002158	up	5962.67	12.5417		51.5986	44.9958	1.14674	0.865534	0.197541
513217058	XP_004946909.1	EPB41L1	EPB41L1	2036	microtubule-associated protein futsch	0	0.0347075	0.0738926	0.0362	0	0	0	0	4709.9	0.015777	up	4709.9	12.2015		66.2241	92.2983	0.717501	0.39556	-0.478947
45382429	NP_990216.1	EZR	EZR	7430	ezrin	0	0	0	0	0.0687727	0	0.0295804	0.0327844	0	0.018538	down	0.000234434	-12.0585		10.3522	11.9603	0.865548	0.845364	-0.208314
513180343	XP_420193.4	F8	F8	2157	coagulation factor VIII	0	0	0	0	0.265782	0.0374081	0.164324	0.155838	0	0.003153	down	4.93281e-05	-14.3072		8.47254	18.0897	0.468362	0.0234924	-1.0943
45383556	NP_989621.1	FABP4	FABP4	2167	fatty acid-binding protein, adipocyte	0.263331	0.0322713	0.068707	0.121436	0.242531	0.204961	0.270065	0.239186	0.507708	0.037616	down	0.507724	-0.977885		22324.4	22187.9	1.00615	0.996743	0.00884552
57530631	NP_001006346.1	FABP5	FABP5	2171	fatty acid binding protein 5 (psoriasis-associated)	0.030721	0	0	0.0102403	0.109109	0.107584	0.125889	0.114194	0.0896749	2.4e-05	down	0.0897362	-3.47817		682.629	1026.61	0.664936	0.231129	-0.588713
513201429	XP_413815.4	FBN1	FBN1	2200	fibrillin-1	0	0	0	0	0.0718811	0.0354247	0	0.0357686	0	0.014588	down	0.000214879	-12.1842		193.133	103.868	1.8594	0.345235	0.89484
429484492	NP_990687.2	FGA	FGA	2243	fibrinogen alpha chain	0.0950997	0.104948	0.223387	0.141145	0	0.0369805	0.032284	0.0230882	6.1133	0.00922199	up	6.1116	2.61155		10.3475	20.0171	0.516936	0.091954	-0.951943
267844833	NP_001161155.1	FGB	FGB	2244	fibrinogen beta chain precursor	0	0.106067	0.0752487	0.0604384	0	0	0	0	7862.83	0.00535999	up	7862.83	12.9408		20.0746	39.937	0.502657	0.00213551	-0.992354
118405160	NP_001072954.1	FGL2	FGL2	10875	fibroleukin precursor	0	0	0	0	0.0343235	0	0.029546	0.0212898	0	0.002891	down	0.000360961	-11.4359		397.529	302.972	1.3121	0.587232	0.391875
513161428	XP_004938226.1	FSTL1	FSTL1	11167	follistatin-related protein 1	0	0	0	0	0.0346492	0.034175	0	0.0229414	0	0.001448	down	0.000334984	-11.5436		296.745	197.84	1.49992	0.424854	0.584887
46048961	NP_989636.1	GAPDH	GAPDH	2597	glyceraldehyde-3-phosphate dehydrogenase	0.0308986	0	0	0.0102995	0.109711	0.0721093	0.0631759	0.0816655	0.126118	0.00165	down	0.126201	-2.98621		906.518	779.768	1.16255	0.81167	0.217291
45384364	NP_990335.1	GDI2	GDI2	2665	rab GDP dissociation inhibitor beta	0	0	0	0	0.106866	0.105373	0.061531	0.0912565	0	5e-06	down	8.42343e-05	-13.5352		92.8419	93.3932	0.994097	0.983813	-0.00854171
513180552	XP_420222.3	GPC4	GPC4	2239	glypican-4	0	0.0326633	0	0.0108878	0.140205	0.0345274	0.121313	0.0986816	0.110332	0.002444	down	0.110401	-3.17917		681.156	427.486	1.5934	0.332353	0.672108
513164727	XP_416989.4	GPC6	GPC6	10082	glypican-6	0	0	0	0	0.0368478	0.0363426	0.0317338	0.0349747	0	9.99999e-07	down	0.000219755	-12.1518		1.59992	3.40998	0.469188	0.0471507	-1.09176
363736119	XP_422110.3	GPD1L	GPD1L	23171	glycerol-3-phosphate dehydrogenase 1-like protein	0	0	0	0	0.0353739	0.0348894	0.0918418	0.054035	0	0.004205	down	0.00014225	-12.7793		23.225	23.6657	0.981379	0.956364	-0.0271174
57524920	NP_001006128.1	GPI	GPI	2821	glucose-6-phosphate isomerase	0	0	0	0	0.0729193	0.0359371	0.126238	0.0783647	0	0.002407	down	9.80904e-05	-13.3155		94.4405	107.48	0.87868	0.70859	-0.186591
45384386	NP_990265.1	GSN	GSN	2934	gelsolin precursor	0.029588	0.0326464	0.139023	0.0670858	0.140136	0.138178	0.212375	0.163563	0.410153	0.027353	down	0.410181	-1.28567		1187.21	1308.29	0.90745	0.896393	-0.14011
363732253	XP_001235594.2	GSTA	GSTA2	2939	glutathione S-transferase	0	0	0	0	0.0356771	0	0.0307197	0.0221323	0	0.002724	down	0.000347227	-11.4918		32.3613	33.061	0.978835	0.954621	-0.0308617
52138655	NP_001004376.1	HBA1	HBA1	3039	hemoglobin subunit alpha-A	0.0916207	0.0673772	0.0717071	0.0769017	0.433849	0.106914	0.344474	0.295079	0.260614	0.013247	down	0.260633	-1.93991		0.878625	0.754073	1.16517		0.220544
52138645	NP_001004375.1	HBAD	HBM	3042	hemoglobin subunit alpha-D	0.0315097	0.0347659	0.0740184	0.0467647	0.149193	0.0735366	0.193778	0.138836	0.336834	0.020585	down	0.336871	-1.56973		5.34761	0.793642	6.73806	0.00047487	2.75233
49169791	NP_990820.1	HBBA	HBE1	3046	hemoglobin subunit beta	0.12901	0	0.0757495	0.068253	0.190869	0.112902	0.264514	0.189429	0.36031	0.024877	down	0.360336	-1.47259		0.205485	0.0736101	2.79154		1.48106
71895591	NP_001026660.1	HBE1	HBE1	3046	epsilon globin	0.0955445	0	0	0.0318482	0.0376693	0.074325	0.0978121	0.0699355	0.455393	0.049786	down	0.455453	-1.13462		0.205485	0.0736101	2.79154		1.48106
363742669	XP_001236427.2	HDGF	HDGF	3068	hepatoma-derived growth factor	0	0	0	0	0.0344036	0	0.0296155	0.0213397	0	0.00278	down	0.000360118	-11.4392		114.113	116.212	0.981944	0.959341	-0.0262872
118082608	XP_001233028.1	HIST2H3D	HIST2H3D	653604	histone H3.2-like	0.0641775	0	0.0376788	0.0339521	0	0	0	0	4417.49	0.00986499	up	4417.49			0.0821311	0.256523	0.32017		-1.64309
45382473	NP_990233.1	HMGB1	HMGB1	3146	high mobility group protein B1	0	0	0	0	0.0351357	0	0.0607425	0.0319594	0	0.010371	down	0.000240484	-12.0218		156.807	133.706	1.17278	0.71363	0.229934
45384514	NP_990659.1	HNRNPAB	HNRNPAB	3182	heterogeneous nuclear ribonucleoprotein A/B	0	0	0	0	0.072972	0	0.0947087	0.0558936	0	0.004026	down	0.000137521	-12.8281		64.6432	63.348	1.02045	0.984807	0.0291992
45383173	NP_989827.1	HNRNPH1	HNRNPH2	3188	heterogeneous nuclear ribonucleoprotein H	0	0	0	0	0.0380928	0.03757	0	0.0252209	0	0.001321	down	0.000304717	-11.6802		281.605	305.094	0.923009	0.871809	-0.115583
157954047	NP_001103255.1	HSP90AA1	HSP90AA1	3320	heat shock protein HSP 90-alpha	0.0879296	0	0	0.0293099	0.208224	0	0.120118	0.109447	0.267799	0.045817	down	0.26785	-1.9005		978.772	816.328	1.19899	0.794958	0.261824
47604960	NP_996842.1	HSP90AB1	HSP90AB1	3326	heat shock cognate protein HSP 90-beta	0	0	0	0	0.0357428	0	0.0307762	0.022173	0	0.002893	down	0.000346589	-11.4945		12.7596	8.78307	1.45275	0.13149	0.538784
45383562	NP_989620.1	HSP90B1	HSP90B1	7184	endoplasmin precursor	0	0	0	0	0	0.0369822	0.0973752	0.0447858	0	0.021509	down	0.000171623	-12.5085		348.578	384.813	0.905837	0.868083	-0.142677
513238548	XP_003643701.2	HSPA5	HSPA5	3309	78 kDa glucose-regulated protein-like, partial	0.0294183	0	0.103665	0.0443611	0.139289	0.102998	0.0601387	0.100809	0.440052	0.043773	down	0.440095	-1.18411		297.028	252.294	1.17731	0.746485	0.235496
45384370	NP_990334.1	HSPA8	HSPA8	3312	heat shock cognate 71 kDa protein	0.121135	0	0.106695	0.0759434	0.250921	0.141377	0.155142	0.18248	0.416173	0.036261	down	0.416198	-1.26466		566.572	442.091	1.28157	0.648486	0.357916
513193820	XP_004942738.1	IDH1	IDH1	3417	isocitrate dehydrogenase [NADP] cytoplasmic	0	0	0	0	0.138377	0.0340857	0.0297507	0.0674044	0	0.014811	down	0.000114039	-13.0982		135.11	139.598	0.967851	0.943336	-0.0471427
45384378	NP_990263.1	KRT7	KRT7	3855	keratin, type II cytoskeletal cochleal	0.0309009	0.0340941	0.0362879	0.033761	0	0	0	0	4392.63	9.99999e-07	up	4392.63	12.1009		26.5888	51.6454	0.514833	0.47626	-0.957824
513177212	XP_419746.4	LAMA2	LAMA2	3908	laminin subunit alpha-2	0	0	0	0	0	0.0350408	0.0305902	0.021877	0	0.002615	down	0.000351276	-11.4751		12.8249	12.5152	1.02475	0.982661	0.0352747
45384220	NP_990617.1	LAMB1	LMNB1	4001	lamin-B1	0	0	0	0	0.0368459	0	0.0317322	0.0228594	0	0.002889	down	0.000336186	-11.5385		5.43389	6.27908	0.865395	0.831664	-0.20857
45383784	NP_989497.1	LAMB2	LAMB2	3913	laminin subunit beta-2 precursor	0	0	0	0	0.114553	0.0376297	0.0990813	0.0837548	0	0.000273	down	9.17783e-05	-13.4115		35.4182	39.4202	0.898478	0.785067	-0.154444
363736407	XP_001234659.2	LAMC1	LAMC1	3915	LOW QUALITY PROTEIN: laminin subunit gamma-1	0	0	0	0	0.114375	0.0375713	0.0328139	0.0615869	0	0.00824099	down	0.000124809	-12.968		113.745	123.796	0.918811	0.868083	-0.12216
56605886	NP_001008440.1	LCP1	LCP1	3936	plastin-2	0	0	0	0	0.0378192	0	0.131034	0.0562843	0	0.028806	down	0.000136566	-12.8381		90.7544	91.0395	0.996869	0.991505	-0.00452417
45384208	NP_990615.1	LDHA	LDHA	3939	L-lactate dehydrogenase A chain	0	0	0	0	0.0364964	0.108054	0.0947738	0.0797748	0	0.000264	down	9.63567e-05	-13.3413		104.548	102.515	1.01983	0.990186	0.0283284
45383766	NP_989508.1	LDHB	LDHB	3945	L-lactate dehydrogenase B chain	0	0	0	0	0	0.0362518	0.127344	0.054532	0	0.029218	down	0.000140954	-12.7925		628.245	475.39	1.32154	0.488932	0.402216
45382785	NP_990826.1	LGALS1	LGALS1	3956	beta-galactoside-binding lectin	0	0	0	0	0.0368677	0	0.0317511	0.0228729	0	0.002767	down	0.000335986	-11.5393		5.43389	6.27908	0.865395	0.831664	-0.20857
113206128	NP_001038138.1	LOC100858355	H1F0	3005	histone H5	0.0299163	0.0660319	0.0702746	0.0554076	0	0	0	0	7208.42	8.19999e-05	up	7208.42	12.8155		0.0429898	0.0280444	1.53292		0.616282
513227129	XP_004948854.1	LOC420156	PLIN3	10226	perilipin-3-like	0.122848	0.101676	0.144276	0.122933	0.072697	0.0358265	0	0.0361745	3.39834	0.004346	up	3.39783	1.76461		1.89234	2.01004	0.941444	0.948838	-0.0870523
71895327	NP_001026283.1	LOC422173	MSN	4478	uncharacterized protein LOC422173	0	0	0	0	0.0354875	0	0.0305549	0.0220141	0	0.002839	down	0.000349089	-11.4841		134.923	211.619	0.637576	0.041701	-0.649331
513192588	XP_003641549.2	LOC423941	HTRA1	5654	serine protease HTRA1	0	0	0	0	0.109641	0	0.0314459	0.047029	0	0.03018	down	0.000163438	-12.579		559.23	450.041	1.24262	0.679993	0.313384
513171889	XP_004939810.1	LOC770011	MYL12B	103910	myosin regulatory light chain 2, smooth muscle minor	0	0	0	0	0.073648	0.036296	0	0.036648	0	0.014422	down	0.000209724	-12.2192		76.6965	85.4392	0.897674	0.77717	-0.155737
513227126	XP_004948853.1	LRG1	LRG1	116844	collagen alpha-2(I) chain	0.0618779	0.0341326	0.0726687	0.0562264	0	0.0360805	0	0.0120268	4.67508	0.003574	up	4.67273	2.22427		3.35997	3.23891	1.03738	0.984376	0.052939
57525373	NP_001006234.1	LTA4H	LTA4H	4048	leukotriene A-4 hydrolase	0	0	0	0	0.0742243	0.109803	0.0319429	0.0719902	0	0.001437	down	0.000106775	-13.1931		65.1928	71.159	0.916157	0.807687	-0.126333
71895311	NP_001026606.1	LTB4DH	PTGR1	22949	prostaglandin reductase 1	0	0	0	0	0.0704764	0.0347395	0.0303247	0.0451802	0	0.001853	down	0.000170125	-12.5211		170.476	224.105	0.760698	0.394191	-0.394605
513167116	XP_418480.4	MAP4	MAP4	4134	microtubule-associated protein 4	0.030768	0	0.0722762	0.0343481	0.109249	0.107723	0.0629077	0.0932933	0.368173	0.010277	down	0.368225	-1.44134		91.0765	81.4223	1.11857	0.838698	0.161656
57530355	NP_001006395.1	MDH1	MDH1	4190	malate dehydrogenase, cytoplasmic	0.0313979	0	0	0.010466	0.074307	0	0.0642001	0.046169	0.226688	0.018822	down	0.226817	-2.1404		193.741	188.07	1.03016	0.974943	0.0428616
50731121	XP_417176.1	MMP1	MMP1	4312	interstitial collagenase	0	0	0	0	0.03585	0	0.0308691	0.0222397	0	0.002791	down	0.00034555	-11.4988		0.477117	11.5395	0.0413463	1.20231e-12	-4.5961
45383321	NP_989751.1	MMP2	MMP2	4313	72 kDa type IV collagenase preproprotein	0	0	0	0	0.188772	0.186128	0.327064	0.233988	0	0.000314	down	3.28535e-05	-14.8936		178.211	102.359	1.74105	0.120055	0.799958
57530557	NP_001006336.1	MVP	MVP	9961	major vault protein	0	0.0323527	0.0344342	0.0222623	0	0	0	0	2896.88	0.001914	up	2896.88	11.5003		47.9372	41.8533	1.14536	0.762912	0.195806
363740732	XP_001233207.2	MXRA7	MXRA7	439921	matrix-remodeling-associated protein 7	0.0321262	0.0709094	0.0377268	0.0469208	0	0	0	0	6104.46	0.001321	up	6104.46	12.5756		182.36	121.752	1.4978	0.163756	0.582846
45384410	NP_990672.1	MYL12A	MYL12A	10627	myosin regulatory light chain 2, smooth muscle minor	0	0	0	0	0.0689117	0.0339612	0	0.034291	0	0.014534	down	0.000224136	-12.1233		253.157	316.512	0.799832	0.460123	-0.322231
45384118	NP_990609.1	MYL9	MYL9	10398	myosin regulatory light chain 2, smooth muscle major	0	0	0	0	0.0745285	0.0367301	0	0.0370862	0	0.014439	down	0.000207246	-12.2364		51.0952	68.5759	0.745089	0.211686	-0.424515
444299628	NP_001263232.1	NACA	NACA	4666	nascent polypeptide-associated complex alpha subunit	0	0	0	0	0.0358025	0.0353121	0	0.0237049	0	0.001461	down	0.000324199	-11.5908		361.984	333.467	1.08552	0.886858	0.11838
57530009	NP_001006469.1	NAP1L4	NAP1L4	4676	nucleosome assembly protein 1-like 4	0	0	0	0	0.0377153	0	0.0324858	0.0234004	0	0.002843	down	0.000328416	-11.5722		93.3457	87.8662	1.06236	0.921515	0.087276
45384000	NP_990596.1	NCL	NCL	4691	nucleolin	0	0	0	0	0.113167	0.037197	0.0324651	0.060943	0	0.00837999	down	0.000126128	-12.9528		130.915	129.069	1.0143	0.993916	0.0204851
118087385	XP_418430.2	NDRG1	NDRG1	10397	protein NDRG1	0.0305734	0	0.0359038	0.022159	0	0	0	0	2883.45	0.003025	up	2883.45	11.4936		154.882	169.559	0.913439	0.878596	-0.130619
363731606	XP_419556.3	NID1	NID1	4811	nidogen-1	0.060175	0.0331924	0.0353277	0.0428984	0.320554	0.0702078	0.0923783	0.161047	0.266372	0.0503579	down	0.266407	-1.9083		65.6218	112.3	0.584343	0.0149442	-0.775114
45383996	NP_990598.1	NPM1	NPM1	4869	nucleophosmin	0	0	0	0	0.0375805	0.0370649	0	0.0248818	0	0.001487	down	0.000308868	-11.6607		738.226	640.304	1.15293	0.782815	0.205305
45382151	NP_990113.1	NRP1	NRP1	8829	neuropilin-1 precursor	0	0	0	0	0.036156	0	0.0938877	0.0433479	0	0.021525	down	0.000177315	-12.4614		143.262	166.777	0.859001	0.788699	-0.219268
45382221	NP_990753.1	P20K	LCN15	389812	extracellular fatty acid-binding protein precursor	0	0	0	0	0.071105	0.0350426	0.0305911	0.0455796	0	0.001872	down	0.000168634	-12.5338		54.724	59.3595	0.921909	0.884454	-0.117303
71895985	NP_001026727.1	PGAM1	PGAM1	5223	phosphoglycerate mutase 1	0	0	0	0	0.0736294	0	0.159389	0.0776728	0	0.01476	down	9.8964e-05	-13.3027		144.045	188.883	0.762619	0.2855	-0.390966
45384486	NP_990316.1	PGK1	PGK1	5230	phosphoglycerate kinase	0.0296806	0	0	0.00989352	0.14053	0	0.0606767	0.0670689	0.147513	0.037852	down	0.147611	-2.76013		104.688	110.765	0.945137	0.898371	-0.081404
45382651	NP_990800.1	PKM2	PKM	5315	pyruvate kinase muscle isozyme	0	0	0	0	0.140868	0.0346994	0.060822	0.0787963	0	0.00589699	down	9.75531e-05	-13.3235		143.594	152.595	0.941015	0.908507	0.0877108
188529139	NP_001120911.1	PLIN1	PLIN1	5346	perilipin-1	0.0910674	0.0669907	0.0712968	0.0764516	0.503234	0.318946	0.529431	0.450537	0.16969	0.000690999	down	0.169704	-2.55891		3375.46	3063.56	1.10181	0.926158	0.139875
57530180	NP_001006431.1	PLS3	PLS3	5358	plastin-3	0	0	0	0	0.138653	0	0.119951	0.0862015	0	0.002282	down	8.91736e-05	-13.453		214.409	236.804	0.905429	0.858691	-0.143326
71896385	NP_001025712.1	POSTN	POSTN	10631	periostin precursor	0	0	0	0	0.140623	0	0.0911974	0.0772736	0	0.00679499	down	9.94752e-05	-13.2953		176.78	123.691	1.4292	0.674535	0.515209
45382027	NP_990792.1	PPIB	PPIB	5479	peptidyl-prolyl cis-trans isomerase B precursor	0	0	0	0	0.107259	0.0352324	0.0307579	0.0577496	0	0.00825799	down	0.000133101	-12.8752		427.151	404.895	1.05497	0.940213	0.0771985
71895209	NP_001026074.1	PPT1	PPT1	5538	palmitoyl-protein thioesterase 1 precursor	0	0	0	0	0.0364352	0	0.0629751	0.0331368	0	0.010233	down	0.000231941	-12.074		151.834	118.425	1.28212	0.461494	0.358528
86129578	NP_001034418.1	PRDX6	PRDX6	9588	peroxiredoxin-6	0	0	0	0	0.113925	0	0.0985372	0.0708209	0	0.002481	down	0.000108538	-13.1695		292.808	304.211	0.962514	0.945851	-0.055121
45382219	NP_990142.1	PSAP	PSAP	5660	proactivator polypeptide precursor	0	0	0	0	0.0728615	0	0.126136	0.0663326	0	0.00946899	down	0.000115881	-13.0751		1074.51	895.593	1.19978	0.804379	0.26277
118087425	XP_418414.2	PSCA	PSCA	8000	prostate stem cell antigen	0	0	0	0	0.0353624	0.0348781	0	0.0234135	0	0.001485	down	0.000328232	-11.573		0.0661347	2.67247	0.0247466		-5.33662
226874900	NP_001012878.2	PSMA2	PSMA2	5683	proteasome subunit alpha type-2	0	0	0	0	0.0351194	0	0.0607153	0.0319449	0	0.010399	down	0.000240593	-12.0211		118.402	115.645	1.02384	0.979406	0.0339901
45383612	NP_989590.1	PTGDS	PTGDS	5730	prostaglandin-H2 D-isomerase precursor	0.03221	0	0	0.0107367	0.152508	0.0751697	0.0658673	0.0978485	0.109728	0.00538699	down	0.109797	-3.18708		355.718	911.945	0.390066	0.000204369	-1.35821
47825391	NP_001001471.1	PTRF	CAVIN1	284119	polymerase I and transcript release factor	0.0299956	0.0993193	0.0352242	0.0548464	0.106519	0.105044	0.0921175	0.101227	0.541818	0.035472	down	0.541853	-0.884028		1011.06	960.363	1.05279	0.956364	0.0742113
363732364	XP_419931.3	PXDN	PXDN	7837	peroxidasin homolog	0	0	0	0	0.113363	0.0372194	0.0652692	0.0719506	0	0.001956	down	0.000106834	-13.1923		29.1701	34.8185	0.837776	0.717662	-0.255363
45383856	NP_989456.1	QSOX1	QSOX1	5768	sulfhydryl oxidase 1 precursor	0	0	0	0	0.137424	0.0338511	0.0593316	0.0768689	0	0.00577599	down	9.99989e-05	-13.2877		113.468	116.651	0.972715	0.958657	-0.0399116
513231751	XP_004949423.1	RAD23B	RAD23B	5887	UV excision repair protein RAD23 homolog B	0	0	0	0	0.0361541	0.0356586	0	0.0239376	0	0.001395	down	0.000321048	-11.6049		49.8517	55.9727	0.890643	0.742107	-0.167081
513219861	XP_417606.4	RBP7	RBP7	116362	retinoid-binding protein 7	0	0	0	0	0.0720588	0.0355127	0.124745	0.0774388	0	0.002499	down	9.9263e-05	-13.2984		2831.62	3312.18	0.85491	0.807687	-0.226155
47604951	NP_990284.1	RPS27A	RPS27A	6233	ubiquitin-40S ribosomal protein S27a	0	0	0	0	0.0726566	0	0.0627692	0.0451419	0	0.00257	down	0.000170269	-12.5199		493.929	452.82	1.09079	0.887896	0.125368
45382861	NP_990837.1	S100A10	S100A10	6281	protein S100-A10	0	0.0319844	0	0.0106615	0.0686046	0.0676519	0.0890061	0.0750875	0.141987	0.000448	down	0.142075	-2.81527		795.695	701.776	1.13383	0.805681	0.181205
145046232	NP_001077389.1	SERPINE2	SERPINE2	5270	plasminogen activator inhibitor type 1, member 2 precursor	0	0	0	0	0.286952	0.212183	0.186312	0.228482	0	4.5e-05	down	3.36452e-05	-14.8592		90.9666	114.481	0.794599	0.539326	-0.331701
381342463	NP_001244218.1	SERPINF1	SERPINF1	5176	pigment epithelium-derived factor precursor	0	0	0	0	0.18136	0.107278	0.0626465	0.117095	0	0.001432	down	6.56483e-05	-13.8949		797.676	486.812	1.63857	0.266112	0.71244
513221260	XP_004947833.1	SFPQ	SFPQ	6421	splicing factor, proline- and glutamine-rich	0	0	0	0	0.0359154	0.0354233	0	0.0237795	0	0.001401	down	0.000323181	-11.5954		44.246	52.3187	0.845701	0.588507	-0.241781
60302796	NP_001012592.1	SH3BGRL	SH3BGRL	6451	SH3 domain-binding glutamic acid-rich-like protein	0	0	0	0	0.0357198	0	0.0307562	0.0221587	0	0.002828	down	0.000346813	-11.4936		389.009	457.368	0.850537	0.799089	-0.233554
513234891	XP_004950011.1	SH3GLB2	SH3GLB2	56904	endophilin-B2	0	0	0	0	0.0344496	0.0339782	0	0.0228093	0	0.001374	down	0.000336924	-11.5353		7.78619	7.10268	1.09623	0.894195	0.132554
45384218	NP_990395.1	SOD1	SOD1	6647	superoxide dismutase [Cu-Zn]	0	0	0	0	0.0727856	0.071774	0	0.0481865	0	0.001319	down	0.000159512	-12.614		335.073	314.629	1.06498	0.930701	0.0908237
513184692	XP_420760.4	SOD3	SOD3	6649	extracellular superoxide dismutase [Cu-Zn]	0	0	0	0	0.0704073	0	0.121882	0.0640965	0	0.00952399	down	0.000119923	-13.0256		405.472	251.472	1.61239	0.291967	0.689204
45383337	NP_989741.1	SPARC	SPARC	6678	SPARC precursor	0	0	0	0	0.103635	0.102188	0.209401	0.138408	0	0.001026	down	5.55399e-05	-14.1361		1891.84	1631.72	1.15941	0.884454	0.213394
45382337	NP_990182.1	SPON1	SPON1	10418	spondin-1 precursor	0	0	0	0	0.0722109	0	0.0310706	0.0344272	0	0.018445	down	0.00022325	-12.1291		52.7588	48.423	1.08954	0.919144	0.123719
513185205	XP_004936291.1	SPON2	SPON2	10417	spondin-2	0	0	0	0	0.0686921	0.0338526	0.0593331	0.0539593	0	8.09999e-05	down	0.00014245	-12.7773		190.296	133.56	1.4248	0.647645	0.510764
45383105	NP_989866.1	SPP1	SPP1	6696	osteopontin precursor	0	0	0	0	0	0.0746674	0.0654252	0.0466975	0	0.002469	down	0.000164598	-12.5688		36.6029	185.549	0.197268	0.0648388	-2.34177
50749298	XP_421576.1	SRGN	SRGN	5552	serglycin	0	0	0	0	0	0.0351049	0.030646	0.021917	0	0.002719	down	0.000350636	-11.4777		21.6547	21.1071	1.02594	0.990391	0.0369514
118101546	XP_001232002.1	STX12	STX12	23673	syntaxin-12	0	0	0	0	0.0363031	0	0.0312623	0.0225218	0	0.002931	down	0.000341223	-11.517		88.2179	86.6536	1.01805	0.990186	0.025811
513240574	XP_428317.4	TERAL2	VCP	7415	transitional endoplasmic reticulum ATPase-like, partial	0	0	0	0	0.147607	0.0363599	0.159721	0.114563	0	0.000404	down	6.70992e-05	-13.8633		72.2578	76.8874	0.939786	0.885602	-0.0895956
45383950	NP_990587.1	TFRC	TFRC	7037	transferrin receptor protein 1	0	0	0	0	0.0343886	0	0.0296025	0.0213303	0	0.002822	down	0.000360276	-11.4386		12.8064	13.22	0.968714	0.948106	-0.045857
363731750	XP_003641018.1	TGFB2	TGFB2	7042	transforming growth factor beta-2	0	0	0	0	0.0351824	0.0347007	0	0.0232943	0	0.001423	down	0.00032991	-11.5656		13.9694	9.66997	1.44462	0.361727	0.530687
45384294	NP_990367.1	TGFBI	TGFBI	7045	transforming growth factor-beta-induced protein ig-h3 precursor	0	0	0	0	0.075727	0.0373208	0.0654308	0.0594929	0	9.09999e-05	down	0.000129202	-12.9181		146.358	52.1176	2.80823	0.00409781	1.48966
45382075	NP_990779.1	TGM2	TGM2	7052	protein-glutamine gamma-glutamyltransferase 2	0.0315699	0	0.0741604	0.0352434	0	0	0	0	4585.47	0.019227	up	4585.47	12.1629		115.619	125.414	0.921903	0.865454	-0.117312
313661364	NP_001186382.1	THBS1	THBS1	7057	thrombospondin-1 precursor	0	0	0	0	0.037901	0	0.0326466	0.0235159	0	0.002837	down	0.000326803	-11.5793		127.139	107.844	1.17892	0.864711	0.237463
48976107	NP_001001755.1	THBS2	THBS2	7058	thrombosp+J309ondin-2 precursor	0	0	0	0	0.0367992	0	0.0636272	0.0334755	0	0.010297	down	0.000229595	-12.0886		45.5473	14.0846	3.23384	0.122045	1.69325
45383544	NP_989629.1	TIMP2	TIMP2	7077	metalloproteinase inhibitor 2 precursor	0	0	0	0	0.181308	0.0714878	0	0.0842653	0	0.01853	down	9.12223e-05	-13.4203		857.035	670.249	1.27868	0.602336	0.354655
513201203	XP_413773.4	TJP1	TJP1	7082	LOW QUALITY PROTEIN: tight junction protein ZO-1	0	0	0	0	0	0.0346816	0.0302744	0.021652	0	0.002699	down	0.000354926	-11.4602		65.5928	84.6622	0.774759	0.486755	-0.36818
118096822	XP_414333.2	TKT	TKT	7086	transketolase	0	0	0	0	0.0747442	0	0.09699	0.0572447	0	0.004006	down	0.000134275	-12.8625		52.0913	58.6217	0.8886	0.736424	-0.170393
47604946	NP_001001315.1	TMSB4X	TMSB4X	7114	thymosin, beta 4	0	0	0	0	0	0.0339621	0.0595253	0.0311624	0	0.010855	down	0.000246633	-11.9853		3053.16	2552.81	1.196	0.76402	0.258219
312032350	NP_990787.2	TNC	TNC	3371	tenascin precursor	0	0	0	0	0.530423	0.383545	0.42885	0.447606	0	4e-06	down	1.71746e-05	-15.8294		70.1747	135.375	0.518371	0.117438	-0.947942
513211441	XP_001231292.3	TNXB	TNXB	7148	LOW QUALITY PROTEIN: tenascin-X	0	0.0332912	0.106323	0.0465382	0	0	0	0	6054.68	0.027392	up	6054.68	12.5638		32.1052	33.902	0.946999	0.944582	-0.0785649
45382061	NP_990782.1	TPI1	TPI1	7167	triosephosphate isomerase	0.125482	0	0	0.0418273	0.111367	0.0732164	0.160697	0.115094	0.36342	0.02554	down	0.363462	-1.46012		179.698	170.471	1.05412	0.9345	0.076044
45382083	NP_990777.1	TPM2	TPM2	7169	tropomyosin beta chain	0.0311589	0.0343792	0.0365915	0.0340432	0	0	0.0317335	0.0105778	3.21835	0.002174	up	3.21674	1.6856		92.2297	100.882	0.914231	0.853383	-0.129369
57525126	NP_001006175.1	TRAP1	TRAP1	10131	heat shock protein 75 kDa, mitochondrial	0	0	0	0	0.0346091	0	0.0297936	0.0214676	0	0.002866	down	0.000357974	-11.4479		40.2915	31.4228	1.28224	0.382345	0.358663
50752600	XP_422851.1	TUBA3E	TUBA3D	113457	tubulin alpha-3 chain	0	0	0	0	0.0380291	0	0.0327582	0.0235958	0	0.002835	down	0.000325697	-11.5842		0.40827	0.153412	2.66127		1.41211
45384338	NP_990646.1	TUBB	TUBB	203068	tubulin beta-7 chain	0	0	0	0	0.0700191	0	0.0908463	0.0536218	0	0.004234	down	0.000143346	-12.7682		84.2653	101.855	0.82731	0.540324	-0.273501
363730444	XP_001231210.2	TUBB2A	TUBB2A	7280	tubulin beta-1 chain-like	0	0	0	0	0.0759825	0	0.098599	0.0581938	0	0.004089	down	0.000132085	-12.8862		16.6629	23.1299	0.720403	0.272641	-0.473125
52138699	NP_001004400.1	TUBB2B	TUBB2B	347733	tubulin beta-2 chain	0	0	0	0	0.0701028	0	0.0909551	0.053686	0	0.003993	down	0.000143175	-12.7699		17.7008	16.3541	1.08235	0.908912	0.114161
153792017	NP_001074329.2	TUBB2C	TUBB4B	10383	tubulin beta-3 chain	0	0	0	0	0.073745	0	0.0956901	0.0564784	0	0.004	down	0.000136097	-12.8431		166.351	146.591	1.13479	0.801735	0.182432
71896203	NP_001026769.1	TUBB6	TUBB3	10381	tubulin beta-4 chain	0	0	0	0	0.0344005	0	0.0296127	0.0213377	0	0.002908	down	0.000360151	-11.4391		3.71481	6.00282	0.618843	0.361415	-0.692355
57530789	NP_001006374.1	TXNDC5	TXNDC5	81567	thioredoxin domain-containing protein 5 precursor	0	0	0	0	0.0344026	0.0339319	0.0296146	0.0326497	0	9.99999e-07	down	0.000235401	-12.0526		42.5904	41.7834	1.01931	0.990186	0.0275964
46048882	NP_990118.1	VCAN	VCAN	1462	versican core protein precursor	0	0	0	0	0.0360688	0	0.062361	0.0328099	0	0.010379	down	0.000234251	-12.0597		5.88671	4.82894	1.21905	0.865547	0.285755
71896765	NP_001026447.1	VTG2		424533 (CHICKEN)	vitellogenin-2 precursor	0	0.0336092	0.0715564	0.0350552	0.108159	0.0710892	0.124801	0.10135	0.345883	0.011112	down	0.345933	-1.53144		31.7834	89.4687	0.355245	0.0122863	-1.49311
513160913	XP_004938134.1	VWF	VWF	7450	von Willebrand factor	0	0	0	0	0.0376865	0	0.0651426	0.0342764	0	0.010362	down	0.000224232	-12.1227		94.3089	146.866	0.642143	0.163236	-0.639034
55741616	NP_001006219.1	YWHAE	YWHAE	7531	14-3-3 protein epsilon	0	0	0.0341507	0.0113836	0.137691	0	0.0594459	0.0657124	0.173233	0.042177	down	0.17333	-2.52841		309.656	366.317	0.845323	0.630105	-0.242425
Diferential proteins (P ≤ 0.05) with NO matching identification by RNA-seq (7 proteins)
363742820	XP_003642711.1	ECM1	ECM1	1893	extracellular matrix protein 1	0	0	0	0	0.105391	0	0.0911415	0.0655107	0	0.002445	down	0.000117335	-13.0571
45383035	NP_989905.1	FLNA	FLNA	2316	filamin-A	0.177883	0.130849	0.313354	0.207362	0.035051	0.0691756	0.0605968	0.0549411	3.77426	0.016158	up	3.77387	1.91604
513159235	XP_004937796.1	HIST1H4A	HIST1H4A	8359	histone H4 type VIII-like	0	0.0339314	0.0361142	0.0233485	0	0	0	0	3038.18	0.001867	up	3038.18	11.569
513233494	XP_004949796.1	KRT3	KRT3	3850	keratin, type II cytoskeletal 6B	0.0300663	0	0.0353077	0.0217913	0	0	0	0	2835.61	0.002952	up	2835.61	11.4694
513178315	XP_004940484.1	LOC101748778			uncharacterized protein LOC101748778	0.0308431	0	0.0362201	0.0223544	0	0	0	0	2908.86	0.00282	up	2908.86	11.5062
513237305	XP_001235537.3	LOC772392	ICAM5	7087	intercellular adhesion molecule 5-like	0	0	0	0	0.0355727	0	0.0306287	0.0220671	0	0.002858	down	0.000348251	-11.4876
45382723	NP_990811.1	MARCKS	MARCKS	4082	myristoylated alanine-rich C-kinase substrate	0	0	0	0	0.0360471	0	0.0310404	0.0223625	0	0.002845	down	0.000343652	-11.5068
Non-diferential proteins (P ≤ 0.05) with matching identification by RNA-seq (199 proteins)
308818184	NP_001184217.1	ACAA1	ACAA1	30	acetyl-Coenzyme A acyltransferase 1 (peroxisomal 3-oxoacyl-Coenzyme A thiolase)	0	0	0	0	0	0	0.0305879	0.010196	0.000753413	0.0779689	down	0.000753413	-10.3743		44.3229	44.9778	0.985439	0.964619	-0.0211616		-0.00968025
57529797	NP_001006511.1	ACADL	ACADL	33	long-chain specific acyl-CoA dehydrogenase, mitochondrial	0	0	0	0	0	0	0.032759	0.0109197	0.000703517	0.0782489	down	0.000703517	-10.4731		150.715	155.511	0.969161	0.943382	-0.045192
480354971	NP_001264708.1	ACAT1	ACAT1	38	acetyl-CoA acetyltransferase, mitochondrial	0	0	0	0	0.0375679	0	0	0.0125226	0.000613519	0.0777119	down	0.000613519	-10.6706		130.429	161.585	0.807187	0.548923	-0.309024
45382927	NP_990849.1	ACTB	ACTB	60	actin, cytoplasmic 1	0.21177	0.233706	0.426369	0.290615	0.35823	0.317869	0.24818	0.308093	0.943272	0.436344	down	0.943272	-0.0842544		2751.58	2723.49	1.01031	0.997672	0.0148019
151176139	ABR87937.1	ACTB	ACTB	60	beta-actin	0.255637	0.246852	0.487828	0.330105	0.378371	0.335727	0.262144	0.325414	1.01442	0.485043	up	1.01442	0.0206507		2751.58	2723.49	1.01031	0.997672	0.0148019
363740848	XP_001236316.2	ACTC2L	ACTG1	71	actin, cytoplasmic 2-like	0.235517	0.259913	0.414906	0.303445	0.383607	0.30944	0.241586	0.311544	0.974005	0.470622	down	0.974005	-0.0379992		65.7549	58.449	1.125	0.774117	0.169921
56119084	NP_001007825.1	ACTG1	ACTG1	71	actin, cytoplasmic type 5	0.214146	0.236327	0.431144	0.293872	0.362282	0.321442	0.250971	0.311565	0.943215	0.437741	down	0.943215	-0.0843411		65.7549	58.449	1.125	0.774117	0.169921
45384010	NP_990503.1	ACTG2	ACTG2	72	actin, gamma-enteric smooth muscle	0.126973	0.105082	0.1491	0.127052	0.150294	0.222298	0.162632	0.178408	0.712153	0.176824	down	0.712153	-0.489741		1644.14	1293.38	1.2712	0.6662	0.34619
45384104	NP_990457.1	ACTN4	ACTN4	81	alpha-actinin-4	0.123697	0.170635	0.108952	0.134428	0.366123	0.252691	0.190205	0.269673	0.498501	0.0628789	down	0.498501	-1.00433		171.719	185.614	0.92514	0.868211	-0.112256
269784810	NP_001161477.1	ACYP1	ACYP1	97	acylphosphatase-1	0	0	0	0	0	0.0341743	0	0.0113914	0.000674401	0.0781049	down	0.000674401	-10.5341		12.5367	15.1461	0.827715	0.709357	-0.272794
513212817	XP_004946005.1	ADAMTSL2	ADAMTSL2	9719	ADAMTS-like 2	0	0	0	0	0.0761067	0	0	0.0253689	0.00030294	0.0754069	down	0.00030294	-11.6887		59.1763	59.413	0.996016	0.986907	-0.00575929
119331100	NP_001073198.1	ADD1	ADD1	118	alpha-adducin	0	0.0707025	0.0376163	0.0361063	0	0.0373604	0	0.0124535	2.89812	0.0771359	up	2.89812	1.53512		85.7932	75.5073	1.13622	0.789392	0.184247
513217491	XP_417331.4	AHCY	AHCY	191	adenosylhomocysteinase	0	0	0	0	0.0376876	0	0	0.0125625	0.00061157	0.0782929	down	0.00061157	-10.6752		12.7778	14.5591	0.877652	0.670737	-0.188279
513221572	XP_004947907.1	AK2	AK2	204	adenylate kinase 2, mitochondrial	0	0	0	0	0	0	0.0314448	0.0104816	0.000732897	0.0780689	down	0.000732897	-10.4141		187.333	213.266	0.878405	0.768411	-0.187042
45383974	NP_990592.1	ALB	ALB	213	serum albumin precursor	0.310084	0.136894	0.291325	0.246101	0.293701	0.180997	0.318023	0.26424	0.931356	0.413386	down	0.931356	-0.102596		83.7804	277.97	0.3014	1.80978e-06	-1.73025
330417943	NP_001193425.1	ALDOC	ALDOC	230	fructose-bisphosphate aldolase C	0.0892777	0	0	0.0297592	0.211435	0	0.0914109	0.100949	0.294849	0.0703819	down	0.294849	-1.76195		131.343	140.664	0.933735	0.905256	-0.0989152
513222569	XP_004948214.1	ALG9	ALG9	79796	alpha-1,2-mannosyltransferase ALG9	0	0	0	0	0	0	0.099075	0.033025	0.000232726	0.0734639	down	0.000232726	-12.0691		17.8039	12.6304	1.4096	0.132734	0.495288
46195459	NP_996789.1	ANXA1	ANXA1	301	annexin A1	0	0	0.102419	0.0341395	0.0343674	0	0.0296003	0.0213226	1.60088	0.298334	up	1.60088	0.678866		1411.2	962.568	1.46608	0.367071	0.551967
347800681	NP_001012921.2	ANXA11	ANXA11	311	annexin A11	0	0	0.0353093	0.0117698	0	0	0	0	1532.01	0.0779059	up	1532.01	10.5812		108.149	107.727	1.00392	0.993916	0.00563961
118405172	NP_001072962.1	AP2M1	AP2M1	1173	AP-2 complex subunit mu	0	0	0	0	0	0	0.0656075	0.0218692	0.000351402	0.0758169	down	0.000351402	-11.4746		209.186	197.073	1.06147	0.93737	0.0860613
45382961	NP_990856.1	APOA1	APOA1	335	apolipoprotein A-I preproprotein	0.180877	0.0332538	0.0708009	0.0949774	0.142761	0.0703649	0.154468	0.122531	0.775141	0.267403	down	0.775141	-0.367468		14547.8	12707	1.14486	0.916942	0.195175
45384392	NP_990269.1	APOA4	APOA4	337	apolipoprotein A-IV precursor	0	0	0.0690591	0.0230197	0	0	0	0	2995.4	0.0761579	up	2995.4	11.5485		4.26533	3.58348	1.19028	0.876817	0.251295
45382733	NP_990814.1	APOV1			apovitellenin-1 precursor	0	0	0	0	0	0	0.0302495	0.0100832	0.000761835	0.0783799	down	0.000761835	-10.3582		93.006	96.6596	0.962201	0.930958	-0.0555901
118093746	XP_426598.2	ARPC2	ARPC2	10109	actin-related protein 2/3 complex subunit 2-like, partial	0	0	0	0	0	0	0.0314647	0.0104882	0.000732435	0.0786259	down	0.000732435	-10.415		93.006	96.6596	0.962201	0.930958	-0.0555901
71896007	NP_001026732.1	ARPC5	ARPC5	10092	actin-related protein 2/3 complex subunit 5	0	0	0	0	0.0366052	0	0	0.0122017	0.000629643	0.0779419	down	0.000629643	-10.6332		230.271	240.278	0.958354	0.929032	-0.0613695
71896007	NP_001026732.1	ARPC5	ARPC5	10092	actin-related protein 2/3 complex subunit 2	0	0	0	0	0	0	0.0313337	0.0104446	0.000735494	0.0781039	down	0.000735494	-10.409		230.271	240.278	0.958354	0.929032	-0.0613695
270288808	NP_001025885.1	ASL2	ASAL	435	argininosuccinate lyase	0	0	0	0	0	0	0.0307217	0.0102406	0.000750135	0.0784009	down	0.000750135	-10.3806		21.1483	25.7063	0.82269	0.595202	-0.281579
45384004	NP_990509.1	ATIC	ATIC	471	bifunctional purine biosynthesis protein PURH	0	0	0	0	0	0.0370537	0	0.0123512	0.000622026	0.0778219	down	0.000622026	-10.6507		102.499	112.362	0.912218	0.845604	-0.132549
448261627	NP_001026562.2	ATP5B	ATP5B	506	ATP synthase subunit beta, mitochondrial precursor	0	0	0.0730082	0.0243361	0	0	0.0316517	0.0105506	2.30566	0.212604	up	2.30566	1.20518		319.072	364.217	0.87605	0.757593	-0.190915
363742094	XP_424534.3	ATP6V1B2	ATP6V1B2	526	V-type proton ATPase subunit B, brain	0	0	0	0	0	0	0.0630627	0.0210209	0.000365577	0.0762999	down	0.000365577	-11.4175		45.3226	44.3821	1.02119	0.986509	0.0302556
45384138	NP_990435.1	BLMH	BLMH	642	bleomycin hydrolase	0	0	0	0	0	0	0.0614682	0.0204894	0.000375057	0.0761229	down	0.000375057	-11.3806		42.0835	34.4695	1.22089	0.485652	0.287933
118083348	XP_416518.2	C1R	C1R	715	complement C1r subcomponent	0	0	0	0	0	0	0.0645775	0.0215258	0.000357005	0.0761259	down	0.000357005	-11.4518		40.0633	41.924	0.955619	0.939966	-0.0654927
71896819	NP_001025948.1	C1S	C1S	716	complement C1s subcomponent precursor	0	0	0	0	0	0	0.0304848	0.0101616	0.000755961	0.0784819	down	0.000755961	-10.3694		38.7027	44.279	0.874065	0.816619	-0.194188
45382303	NP_990736.1	C3	C3	718	complement C3 precursor	0	0.0355036	0.0377873	0.0244303	0.0380529	0	0.0327783	0.0236104	1.03471	0.465427	up	1.03471	0.0492314		27.1851	24.1922	1.12371	0.903399	0.168273
45384366	NP_990336.1	CALM2	CALM2	805	calmodulin	0.0315669	0	0.0741526	0.0352398	0.0747074	0.110519	0	0.061742	0.570813	0.156746	down	0.570813	-0.80891		1082.01	975.653	1.10901	0.872621	0.149268
347800637	NP_001025791.2	CANX	CANX	821	calnexin precursor	0	0	0.0725362	0.0241787	0.0365149	0	0	0.0121716	1.98586	0.24209	up	1.98586	0.989764		129.249	160.057	0.807517	0.543007	-0.308435
513240545	XP_004951004.1	CAPG	CAPG	822	macrophage-capping protein-like	0	0	0	0	0	0	0.0325777	0.0108592	0.000707429	0.0785429	down	0.000707429	-10.4651		11.0535	9.40498	1.17528	0.869555	0.233003
291084676	NP_001167000.1	CAPZB	CAPZB	832	capping protein (actin filament) muscle Z-line, beta	0	0	0	0	0.074177	0	0	0.0247257	0.000310818	0.0753139	down	0.000310818	-11.6516		119.596	130.546	0.916116	0.824181	-0.126398
71894965	NP_001026386.1	CAT	CAT	847	catalase	0	0	0	0	0.0699721	0	0	0.023324	0.00032949	0.0762949	down	0.00032949	-11.5675		84.1665	84.5149	0.995877	0.988424	-0.00596
50760928	XP_418185.1	CD320	CD320	51293	NADH dehydrogenase [ubiquinone] 1 alpha subcomplex subunit 7	0	0	0.0357087	0.0119029	0.0359573	0.0354647	0	0.0238073	0.500129	0.0820559	down	0.500129	-0.999628		19.3639	30.9824	0.624998	0.0842425	-0.678077
363736454	XP_426613.3	CFH	CFH	3075	complement factor H	0	0	0	0	0.0736067	0	0	0.0245356	0.000313225	0.0757159	down	0.000313225	-11.6405		194.443	130.922	1.48519	0.233817	0.570645
513214358	XP_004946391.1	CHAD	CHAD	1101	chondroadherin	0	0	0	0	0	0	0.030215	0.0100717	0.000762706	0.0785609	down	0.000762706	-10.3566		121.293	99.9207	1.21389	0.782969	0.279637
513221073	XP_004947781.1	CLIC4	CLIC4	25932	chloride intracellular channel protein 4	0	0	0	0	0	0	0.0312237	0.0104079	0.000738085	0.0783749	down	0.000738085	-10.4039		163.309	212.796	0.767444	0.413861	-0.381866
213983259	NP_001135728.1	CNN2	CNN2	1265	calponin-2	0	0	0	0	0	0	0.030701	0.0102337	0.00075064	0.0782369	down	0.00075064	-10.3796		58.6197	42.8204	1.36897	0.172514	0.453087
513199311	XP_001234730.3	COL4A3	COL4A3	1285	collagen alpha-3(IV) chain	0	0	0	0	0	0.101865	0	0.0339551	0.000226353	0.0737119	down	0.000226353	-12.1091		0.330734	0.171041	1.93365	0.128836	0.95133
45382993	NP_990865.1	COL6A3	COL6A3	1293	collagen alpha-3(VI) chain precursor	0.381715	0.680431	0.999992	0.687379	0.661024	0.411641	0.482258	0.518307	1.3262	0.255178	up	1.3262	0.407293		218.336	131.522	1.66007	0.237768	0.731248
482661642	NP_001264798.1	CORO1C	CORO1C	23603	coronin-1C	0	0	0	0	0	0	0.0622758	0.0207586	0.000370195	0.0761889	down	0.000370195	-11.3994		133.646	141.377	0.945316	0.901533	-0.0811307
45382597	NP_990579.1	CSRP1	CSRP1	1465	cysteine and glycine-rich protein 1	0.062946	0	0	0.020982	0	0	0	0	2730.34	0.0762909	up	2730.34	11.4149		280.368	262.208	1.06926	0.929734	0.0966101
71895603	NP_001026662.1	CTSA	CTSA	5476	lysosomal protective protein precursor	0	0	0	0	0.0346499	0	0	0.01155	0.000665151	0.0783949	down	0.000665151	-10.554		201.496	170.533	1.18157	0.81167	0.240699
513166307	XP_417207.3	CTSC	CTSC	1075	dipeptidyl peptidase 1	0	0	0	0	0.075073	0	0	0.0250243	0.00030711	0.0759849	down	0.00030711	-11.669		102.182	114.335	0.893712	0.897296	-0.162118
269784818	NP_001161481.1	CTSV	CTSV	1515	cathepsin L1 precursor	0.0296796	0	0	0.0098932	0.140525	0	0	0.0468416	0.211335	0.126667	down	0.211335	-2.2424		216.337	259.643	0.83321	0.719804	-0.263247
363741689	XP_417483.3	CTSZ	CTSZ	1522	cathepsin Z	0	0	0	0	0	0	0.0305721	0.0101907	0.000753802	0.0783299	down	0.000753802	-10.3735		380.196	339.305	1.12051	0.847626	0.164158
71896943	NP_001025918.1	DCN	DCN	1634	decorin precursor	0.0589553	0.162665	0.242344	0.154655	0.0697549	0.103196	0.2115	0.12815	1.20681	0.328421	up	1.20681	0.2712		934.482	704.304	1.32682	0.648486	0.407968
513194584	XP_004942895.1	DES	DES	1674	LOW QUALITY PROTEIN: desmin	0	0	0.107103	0.035701	0.0719308	0.0709312	0.0621395	0.0683338	0.522503	0.100582	down	0.522503	-0.936488		43.7036	66.6696	0.655525	0.284339	-0.609277
45382979	NP_990859.1	DSTN	DSTN	11034	destrin	0	0	0	0	0	0	0.0305905	0.0101968	0.000753349	0.0789799	down	0.000753349	-10.3744		428.428	441.852	0.969618	0.953794	-0.044511
482677670	NP_001264808.1	DYL1	DYNLL1	8655	dynein, light chain, LC8-type 1	0	0	0	0	0	0	0.0626884	0.0208961	0.000367759	0.0758209	down	0.000367759	-11.409		155.921	142.857	1.09145	0.865352	0.126251
71895537	NP_001025744.1	DYNC1LI2	DYNC1LI2	1783	cytoplasmic dynein 1 light intermediate chain 2	0	0.0327829	0	0.0109276	0	0	0	0	1422.47	0.0781759	up	1422.47	10.4742		47.5449	58.0329	0.819274	0.431286	-0.287583
513216652	XP_004946822.1	DYNLL2	DYNLL2	140735	dynein light chain 2, cytoplasmic	0	0	0	0	0	0	0.0646521	0.0215507	0.000356593	0.0755799	down	0.000356593	-11.4534		74.1011	35.5583	2.08393	0.000420965	1.05931
54020687	NP_989488.2	EEF1A1	EEF1A1	1915	elongation factor 1-alpha 1	0	0	0.0725899	0.0241966	0.0365599	0	0.0632116	0.0332572	0.727625	0.301183	down	0.727625	-0.458734		4295.71	3847.27	1.11656	0.90718	0.159059
513173818	XP_004940146.1	EEF1D	EEF1D	1936	uncharacterized protein LOC769368	0	0	0	0	0	0	0.0655418	0.0218473	0.000351754	0.0757259	down	0.000351754	-11.4731		771.582	608.971	1.26703	0.639954	0.341447
45382453	NP_990699.1	EEF2	EEF2	1938	elongation factor 2	0.0313444	0.0345839	0	0.0219761	0.111294	0	0.0640908	0.0584616	0.375988	0.0809549	down	0.375988	-1.41124		625.336	661.702	0.945041	0.933878	-0.081551
71895641	NP_001026211.1	EHD3	EHD3	30845	EH domain-containing protein 3	0	0	0.0361165	0.0120388	0.0363687	0	0.0313186	0.0225624	0.533738	0.113378	down	0.533738	-0.905796		173.149	182.243	0.950101	0.923792	-0.0738478
45382393	NP_990207.1	ENO2	ENO2	2026	gamma-enolase	0	0	0.0357581	0.0119194	0	0.0355256	0.0310055	0.022177	0.537625	0.114741	down	0.537625	-0.895329		9.42316	7.36927	1.27871	0.59337	0.354689
57530349	NP_001006398.1	EPRS	EPRS	2058	bifunctional aminoacyl-tRNA synthetase	0	0	0	0	0	0	0.0326504	0.0108835	0.000705856	0.0783509	down	0.000705856	-10.4683		29.8857	29.7426	1.00481	0.994057	0.00692555
444741647	NP_001263253.1	ERP29	ERP29	10961	endoplasmic reticulum resident protein 29 precursor	0	0.0352302	0.0374963	0.0242422	0.0377594	0.0372413	0	0.0250002	0.969687	0.466573	down	0.969687	-0.0444093		104.482	119.757	0.872446	0.741081	-0.196862
513164985	XP_004938693.1	ES1ML1	LOC102724023	102724023	ES1 protein homolog, mitochondrial	0	0	0	0	0.0699768	0	0	0.0233256	0.000329468	0.0755849	down	0.000329468	-11.5676		88.9042	70.8343	1.2551	0.397749	0.327803
71894843	NP_001026060.1	FABP3	FABP3	2170	fatty acid-binding protein, heart	0.0320708	0.0353852	0.0376619	0.0350393	0.0759004	0.0374064	0.0655805	0.0596291	0.587674	0.0892599	down	0.587674	-0.766913		1328.4	1416.76	0.937635	0.917779	-0.0929024
513212076	XP_003642321.2	FAM129B	FAM129B	64855	family with sequence similarity 129, member B, partial	0	0	0.0361359	0.0120453	0	0.0358889	0.0313357	0.0224082	0.537698	0.115367	down	0.537698	-0.895133		115.811	120.38	0.962048	0.934293	-0.0558193
513209015	XP_414753.4	FAM20C	FAM20C	56975	extracellular serine/threonine protein kinase FAM20C	0	0	0	0	0.0748913	0	0	0.0249638	0.000307855	0.0751759	down	0.000307855	-11.6655		154.984	140.262	1.10497	0.880097	0.144003
45384500	NP_990320.1	FGG	FGG	2266	fibrinogen, gamma chain precursor	0	0.100418	0.0356139	0.0453438	0.0358629	0.0707748	0.0308803	0.0458393	0.989192	0.49121	down	0.989192	-0.0156771		11.1417	43.3281	0.257147	1.21557e-13	-1.95933
71896431	NP_001025512.1	FLNB	FLNB	2317	filamin-B	0.0934129	0.206131	0.365663	0.221736	0.221185	0.290784	0.319321	0.277097	0.800216	0.276311	down	0.800216	-0.321538		76.2005	114.387	0.666167	0.160924	-0.586044
46048750	NP_990523.1	FOXD1	FOXD1	2297	forkhead box protein D1	0	0	0	0	0	0	0.0314445	0.0104815	0.000732905	0.0782969	down	0.000732905	-10.4141		2.26051	3.50037	0.645793	0.464411	-0.630856
57525015	NP_001006150.1	G3BP1	G3BP1	10146	ras GTPase-activating protein-binding protein 1	0	0	0	0	0	0	0.0307017	0.0102339	0.000750623	0.0785789	down	0.000750623	-10.3796		66.475	68.309	0.97315	0.943336	-0.0392656
513236352	XP_004950261.1	GFCBPL	FCGBP	8857	IgGFc-binding protein-like	0	0	0	0	0.0734758	0	0	0.0244919	0.000313784	0.0753069	down	0.000313784	-11.6379		56.3972	72.6886	0.775873	0.470833	-0.366107
513172280	XP_419226.4	GGH	GGH	8836	gamma-glutamyl hydrolase	0	0	0	0	0	0	0.0316535	0.0105512	0.000728069	0.0783689	down	0.000728069	-10.4236		23.5821	32.205	0.732249	0.193805	-0.449593
50740506	XP_419481.1	GLO1	GLO1	2739	lactoylglutathione lyase	0	0	0	0	0	0	0.0327398	0.0109133	0.000703929	0.0782539	down	0.000703929	-10.4723		144.164	115.363	1.24965	0.488932	0.321529
313760582	NP_001186488.1	GNS	GNS	2799	N-acetylglucosamine-6-sulfatase precursor	0	0	0	0	0	0	0.0316748	0.0105583	0.00072758	0.0786699	down	0.00072758	-10.4246		122.065	120.799	1.01049	0.997262	0.0150482
45382953	NP_990854.1	GOT2	GOT2	2806	aspartate aminotransferase, mitochondrial precursor	0	0	0	0	0.0693967	0	0	0.0231322	0.000332221	0.0758029	down	0.000332221	-11.5556		65.9813	64.1866	1.02796	0.973482	0.0397836
118094855	XP_422590.2	GPC1	GPC1	2817	glypican-1	0	0	0	0	0	0.14854	0	0.0495134	0.000155238	0.0702149	down	0.000155238	-12.6532		139.201	158.168	0.880084	0.826682	-0.184287
86129536	NP_001034405.1	GUSB	GUSB	2990	beta-glucuronidase precursor	0	0	0	0	0	0	0.0613473	0.0204491	0.000375796	0.0767859	down	0.000375796	-11.3778		43.465	44.2839	0.981509	0.973696	-0.0269269
513221877	XP_004947974.1	H2AFX	H2AFX	3014	histone H2A.x-like	0	0	0	0	0	0.0682109	0	0.022737	0.000337995	0.0755519	down	0.000337995	-11.5307		71.2269	54.8272	1.29912	0.55055	0.377532
71897327	NP_001026545.1	H2AFZ	H2AFZ	3015	histone H2A.Z	0	0	0	0	0	0.0372401	0	0.0124134	0.000618915	0.0773879	down	0.000618915	-10.658		88.8941	73.1878	1.2146	0.502242	0.280484
46048708	NP_990627.1	H3F3B	H3F3B	3021	histone H3.3	0.0602483	0	0	0.0200828	0	0	0	0	2613.37	0.0760219	up	2613.37	11.3517		67.8357	60.9144	1.11362	0.840784	0.155263
52138683	NP_001004390.1	HBBR	HBG1	419079	hemoglobin subunit rho	0.0640691	0	0	0.0213564	0	0.0373592	0.0654985	0.0342859	0.622976	0.204408	down	0.622976	-0.682752		196.18	123.769	1.58504	0.397204	0.664524
126165290	NP_001075173.1	HBE	HBE	3046	hemoglobin subunit epsilon	0.0609708	0	0	0.0203236	0	0.0355512	0.0623197	0.0326236	0.62306	0.205128	down	0.62306	-0.682556		196.18	123.769	1.58504	0.397204	0.664524
513159232	XP_001233171.3	HIST2H3L	HIST2H3C	126961	uncharacterized protein LOC769852	0.0305143	0	0	0.0101714	0	0	0	0	1324.1	0.0784599	up	1324.1	10.3708		254.865	269.856	0.944446	0.908507	-0.0824603
71896753	NP_001026156.1	HNRNPA2B1	HNRNPA2B1	3181	heterogeneous nuclear ribonucleoproteins A2/B1	0	0	0	0	0.0368866	0	0	0.0122955	0.000624843	0.0778999	down	0.000624843	-10.6442		254.865	269.856	0.944446	0.908507	-0.0824603
60302824	NP_001012610.1	HNRNPH3	HNRNPH3	3189	heterogeneous nuclear ribonucleoprotein H3	0	0	0	0	0.0747145	0	0	0.0249048	0.000308583	0.0753109	down	0.000308583	-11.6621		177.248	185.763	0.954163	0.913175	-0.0676922
71896353	NP_001026103.1	HNRNPM	HNRNPM	4670	heterogeneous nuclear ribonucleoprotein M	0	0	0.0356018	0.0118673	0	0	0	0	1544.7	0.0781589	up	1544.7	10.5931		65.7117	71.006	0.925438	0.843882	-0.111792
45384344	NP_990342.1	HPGDS	HPGDS	27306	hematopoietic prostaglandin D synthase	0	0	0	0	0.0355075	0	0	0.0118358	0.000649095	0.0783929	down	0.000649095	-10.5893		33.5566	88.4017	0.379592	0.117438	-1.39748
55742654	NP_001006686.1	HSPA2	HSPA2	3306	heat shock 70 kDa protein	0.0912033	0	0.178525	0.0899095	0.107928	0.141923	0.0933396	0.114397	0.785957	0.287387	down	0.785957	-0.347477		821.068	634.645	1.29374	0.658335	0.371552
45384222	NP_990621.1	HSPB1	HSPB1	3315	heat shock protein beta-1	0	0	0.03764	0.0125467	0	0	0	0	1633.07	0.0781869	up	1633.07	10.6734		57.3558	59.1641	0.969436	0.944582	-0.0447817
363733410	XP_420577.3	IGFBP7	IGFBP7	3490	insulin-like growth factor binding protein 7	0	0	0	0	0	0	0.159821	0.0532737	0.000144282	0.0698049	down	0.000144282	-12.7588		560.513	626.104	0.895239	0.839243	-0.159656
45382385	NP_990202.1	IL6ST	IL6ST	35720	interleukin-6 receptor subunit beta precursor	0	0	0	0	0	0	0.0656942	0.0218981	0.000350939	0.0759889	down	0.000350939	-11.4765		35.1048	49.9581	0.702685	0.113614	-0.50905
513202372	XP_413959.4	IQGAP1	IQGAP1	8826	IQ motif containing GTPase activating protein 1	0	0	0.0354316	0.0118105	0	0.0351893	0.0307203	0.0219699	0.537741	0.114723	down	0.537741	-0.895018		31.009	42.2979	0.73311	0.248218	-0.447899
71895483	NP_001025754.1	KARS	KARS	3735	lysine--tRNA ligase	0	0	0	0	0	0	0.0640279	0.0213426	0.000360068	0.0764829	down	0.000360068	-11.4394		206.159	234.395	0.879537	0.777525	-0.185183
485049501	NP_990340.2	KRT19	KRT19	3880	keratin, type I cytoskeletal 19	0.0640466	0	0.0752154	0.0464207	0	0	0.0654751	0.021825	2.12655	0.0837609	up	2.12655	1.08851		40.5255	41.5155	0.976153	0.986252	-0.0348204
45382421	NP_990707.1	KTN1	KTN1	3895	kinectin	0	0	0	0	0	0	0.0626253	0.0208751	0.00036813	0.0760919	down	0.00036813	-11.4075		27.9232	26.4231	1.05677	0.930999	0.0796622
45384050	NP_990484.1	L1CAM	L1CAM	3897	neuronal-glial cell adhesion molecule precursor	0	0	0	0	0	0	0.064027	0.0213423	0.000360074	0.0760299	down	0.000360074	-11.4394		1.53146	2.4187	0.633177	0.307187	-0.65932
513177610	XP_004940355.1	LAMA4	LAMA4	3910	laminin subunit alpha-4	0	0	0	0	0.0711764	0	0	0.0237255	0.000323917	0.0751459	down	0.000323917	-11.5921		41.7535	47.3549	0.881715	0.77717	-0.181616
293601661	NP_001170800.1	LASP1	LASP1	3927	LIM and SH3 domain protein 1	0	0	0	0	0	0.0354629	0	0.011821	0.000649911	0.0780639	down	0.000649911	-10.5875		123.098	94.0601	1.30872	0.289495	0.388157
45384202	NP_990616.1	LMNB2	LMNB2	84823	lamin-B2	0.030009	0.0331101	0.0352401	0.0327864	0.0710187	0.035	0.0305537	0.0455241	0.720245	0.22861	down	0.720245	-0.47344		9.7009	14.1181	0.687126	0.314606	-0.541354
363745877	XP_003643449.1	LOC100857892	TECTA	7007	alpha-tectorin-like	0	0	0	0	0.0723162	0	0	0.0241054	0.000318813	0.0754189	down	0.000318813	-11.615		96.7832	72.2038	1.34042	0.542686	0.422682
363735454	XP_003641562.1	LOC100858647	MSMB	4477	beta-microseminoprotein-like	0	0	0	0	0	0	0.0626229	0.0208743	0.000368144	0.0762869	down	0.000368144	-11.4074		309.389	233.318	1.32604	0.530142	0.407125
513215275	XP_004946495.1	LOC100859865	EIF4H	7458	eukaryotic translation initiation factor 4H-like	0	0	0	0	0	0	0.0321541	0.010718	0.000716742	0.0780349	down	0.000716742	-10.4463		109.608	113.209	0.968195	0.929734	-0.0466297
513193044	XP_004942556.1	LOC101748441	BUD23	114049	NADH dehydrogenase [ubiquinone] 1 alpha subcomplex assembly factor 5-like	0	0	0	0	0.0363863	0	0	0.0121288	0.000633429	0.0784429	down	0.000633429	-10.6245		30.2749	33.9119	0.892753	0.723717	-0.163667
47604962	NP_990743.1	LOC396380	GSTA1	2938	glutathione S-transferase 3	0	0	0	0	0.0359554	0	0	0.0119851	0.000641015	0.0779809	down	0.000641015	-10.6074		69.377	64.1492	1.0815	0.913175	0.113028
50729210	XP_425456.1	LOC427882	HIST1H1D	3007	histone H1	0	0	0.071087	0.0236957	0.0357848	0	0.0308126	0.0221991	1.06739	0.465438	up	1.06739	0.0940882		32.0321	33.4871	0.95655	0.918715	-0.0640873
513203731	XP_004944332.1	LOC776594	DCUN1D5	84259	uncharacterized protein LOC776594	0	0	0	0	0.0354446	0	0	0.0118149	0.000650247	0.0781749	down	0.000650247	-10.5867		18.3647	17.1328	1.07191	0.926547	0.100178
45382725	NP_990812.1	LOX	LOX	4015	protein-lysine 6-oxidase precursor	0	0	0	0	0.0753585	0	0	0.0251195	0.000305946	0.0754599	down	0.000305946	-11.6744		174.14	152.868	1.13915	0.870775	0.187955
513234391	XP_423667.4	LOXL3	LOXL3	84695	lysyl oxidase homolog 3	0	0	0	0	0.0380067	0	0	0.0126689	0.000606439	0.0777349	down	0.000606439	-10.6874		34.1556	34.4184	0.992363	0.976449	-0.0110608
49258194	NP_990613.1	LPL	LPL	4023	lipoprotein lipase precursor	0	0	0	0	0	0	0.0322954	0.0107651	0.000713608	0.0782749	down	0.000713608	-10.4526		712.191	799.031	0.891319	0.889839	-0.165987
444741714	NP_001263286.1	LUM	LUM	4060	lumican precursor	0.0949073	0.0698282	0.111443	0.0920595	0.0374122	0.0738295	0.0646891	0.0586436	1.56974	0.109095	up	1.56974	0.650525		247.999	209.856	1.18176	0.801299	0.240936
52138689	NP_001004399.1	LY86	LY86	9450	lymphocyte antigen 86 precursor	0	0	0	0	0	0	0.0326294	0.0108765	0.000706308	0.0787829	down	0.000706308	-10.4674		248.329	78.2536	3.17339	0.00249625	1.66602
513221200	XP_417771.4	MAP7D1	MAP7D1	55700	LOW QUALITY PROTEIN: MAP7 domain-containing protein 1	0	0	0	0	0	0.0720439	0	0.0240146	0.000320018	0.0758439	down	0.000320018	-11.6096		32.6596	29.0054	1.12598	0.788699	0.171188
50758110	XP_415765.1	MDH2	MDH2	4191	malate dehydrogenase, mitochondrial	0.0635481	0	0.0746305	0.0460595	0.112807	0.111232	0	0.0746795	0.616803	0.146091	down	0.616803	-0.697119		96.3865	102.952	0.936225	0.880624	-0.0950733
363740226	XP_003642282.1	MIF	MIF	4282	macrophage migration inhibitory factor	0	0	0	0	0.0368496	0	0	0.0122832	0.00062547	0.0779949	down	0.00062547	-10.6428		121.614	122.828	0.990117	0.974531	-0.0143296
45382789	NP_989998.1	MMP9	MMP9	4318	matrix metalloproteinase-9 precursor	0	0	0	0	0	0	0.0644343	0.0214781	0.000357798	0.0764659	down	0.000357798	-11.4486		0.877221	1.58474	0.553541	0.271686	-0.853238
513235641	XP_004950143.1	MT	BUD23	114049	malonyl-CoA O-methyltransferase BioC	0	0	0	0	0.0367807	0	0	0.0122602	0.00062664	0.0773659	down	0.00062664	-10.6401		30.2749	33.9119	0.892753	0.723717	-0.163667
45382431	NP_990217.1	MTPN	MTPN	136319	myotrophin	0	0	0	0	0.035657	0	0	0.0118857	0.000646375	0.0779549	down	0.000646375	-10.5953		76.3695	87.31	0.874694	0.67581	-0.19315
45382679	NP_990805.1	MYH10	MYH10	4628	myosin-10	0	0	0.172067	0.0573557	0	0.0341734	0	0.0113911	5.0324	0.120709	up	5.0324	2.33125		29.3117	21.844	1.34186	0.369307	0.424235
45384060	NP_990605.1	MYH11	MYH11	4629	myosin-11	0	0.0641044	0.102344	0.0554829	0.068732	0	0	0.0229107	2.42123	0.0882249	up	2.42123	1.27574		52.2721	56.6722	0.922359	0.909683	-0.116599
45382693	NP_990808.1	MYH9	MYH9	4627	myosin-9	0.122759	0.0677042	0.540585	0.243683	0.254288	0.0716111	0.0312484	0.119049	2.04684	0.151367	up	2.04684	1.0334		220.289	296.198	0.743722	0.475621	-0.427164
45642714	NP_990790.1	MYLK	MYLK	4638	myosin light chain kinase, smooth muscle	0.0313439	0	0	0.010448	0	0	0	0	1360.07	0.0787239	up	1360.07	10.4095		12.0206	16.9136	0.710707	0.14529	-0.492672
50728360	XP_416106.1	NAP1L1	NAP1L1	4673	nucleosome assembly protein 1-like 1	0	0	0	0	0	0	0.0628744	0.0209581	0.000366672	0.0759169	down	0.000366672	-11.4132		259.311	281.408	0.921475	0.885602	-0.117983
312596901	NP_001186099.1	NDUFV3	NDUFV3	4731	NADH dehydrogenase [ubiquinone] flavoprotein 3, mitochondrial	0	0.0352852	0	0.0117617	0	0	0	0	1530.97	0.0781989	up	1530.97	10.5802		31.318	21.6268	1.44812	0.125422	0.534176
237858648	NP_001153795.1	NFASC	NFASC	23114	neurofascin	0	0.0682787	0	0.0227596	0	0	0	0	2961.57	0.0752669	up	2961.57	11.5321		86.5176	70.3818	1.22926	0.736424	0.297791
71897147	NP_001025816.1	NMRAL1	NMRAL1	57407	nmrA-like family domain-containing protein 1	0	0	0	0	0	0	0.0327958	0.0109319	0.000702727	0.0783889	down	0.000702727	-10.4747		3.50561	6.20991	0.564519	0.14092	-0.824906
513235208	XP_001234986.3	NPEPPS	NPEPPS	9520	puromycin-sensitive aminopeptidase	0	0	0	0	0	0	0.0327382	0.0109127	0.000703964	0.0785509	down	0.000703964	-10.4722		60.8908	57.5188	1.05862	0.923541	0.0821899
57530004	NP_001006468.1	NUCB2	NUCB2	4925	nucleobindin-2 precursor	0	0	0	0	0	0	0.063809	0.0212697	0.000361303	0.0758259	down	0.000361303	-11.4345		54.6151	69.7055	0.783512	0.35466	-0.351972
45383706	NP_989540.1	OGN	OGN	4969	mimecan precursor	0.0882298	0.129818	0.0345247	0.0841907	0.0347838	0.0686477	0.150698	0.0847097	0.993874	0.493439	down	0.993874	-0.00886525		121.498	69.972	1.73639	0.159747	0.796089
71896197	NP_001026768.1	PABPC1	PABPC1	26986	polyadenylate-binding protein 1	0	0.103791	0.0368105	0.0468671	0	0.0365783	0.0319253	0.0228345	2.05211	0.16375	up	2.05211	1.03711		686.079	648.19	1.05845	0.943845	0.0819585
118100597	XP_417367.2	PABPC1L	PABPC1L	80336	embryonic polyadenylate-binding protein-like	0	0.0331739	0	0.011058	0	0	0	0	1439.42	0.0781459	up	1439.42	10.4913		1.71881	2.15103	0.799065	0.706154	-0.323615
347920951	NP_001026082.2	PAFAH1B2	PAFAH1B2	5049	platelet-activating factor acetylhydrolase IB subunit beta	0	0	0	0	0	0	0.0325029	0.0108343	0.000709055	0.0778759	down	0.000709055	-10.4618		46.1389	48.3292	0.95468	0.905687	-0.0669109
513160649	XP_004938087.1	PARVB	PARVB	29780	beta-parvin	0	0	0	0	0	0	0.0649099	0.0216366	0.000355177	0.0756779	down	0.000355177	-11.4592		18.7788	14.2317	1.31951	0.589408	0.399998
45383890	NP_989441.1	PDIA3	PDIA3	2923	protein disulfide-isomerase A3 precursor	0.0304088	0.033571	0.0714752	0.0451517	0.21612	0.0710075	0	0.0957093	0.471801	0.155945	down	0.471801	-1.08375		234.126	251.121	0.932325	0.897858	-0.101096
57530768	NP_001006370.1	PDIA4	PDIA4	9601	protein disulfide-isomerase A4	0.03072	0	0.072164	0.0342947	0.0363274	0.0358296	0	0.0240523	1.4257	0.276816	up	1.4257	0.51167		118.553	121.426	0.976343	0.962232	-0.0345407
50745031	XP_419952.1	PDIA6	PDIA6	10130	protein disulfide-isomerase A6	0.0308226	0	0.108605	0.046476	0.0729448	0.0359494	0.0313889	0.046761	0.993905	0.495374	down	0.993905	-0.0088196		114.068	102.815	1.10945	0.86542	0.14985
513191057	XP_004942149.1	PDLIM1	PDLIM1	9124	PDZ and LIM domain protein 1	0.0319078	0	0.0374705	0.0231261	0	0.0372154	0	0.0124051	1.8637	0.115308	up	1.8637	0.898171		104.553	101.455	1.03054	0.977112	0.043395
119331076	NP_001073185.1	PEPD	PEPD	5184	xaa-Pro dipeptidase	0	0	0	0	0	0.0354621	0	0.0118207	0.000649926	0.0786849	down	0.000649926	-10.5874		66.8482	57.9565	1.15342	0.731107	0.205918
57529439	NP_001006303.1	PGD	PGD	5226	6-phosphogluconate dehydrogenase, decarboxylating	0.0320527	0	0	0.0106842	0	0	0	0	1390.81	0.0784389	up	1390.81	10.4417		61.8404	61.3449	1.00808	0.998063	0.0116059
71896147	NP_001026759.1	PGLS	PGLS	25796	6-phosphogluconolactonase	0	0	0	0	0	0	0.0626262	0.0208754	0.000368124	0.0765199	down	0.000368124	-11.4075		102.47	87.9569	1.16501	0.660558	0.220337
429903872	NP_001258868.1	PGRMC1	PGRMC1	10857	membrane-associated progesterone receptor component 1	0	0.0355957	0	0.0118652	0	0.0376279	0.032864	0.0234973	0.505124	0.0969719	down	0.505124	-0.985291		372.604	434.731	0.85709	0.778709	-0.222482
513166497	XP_423671.4	PICALM	PICALM	8301	LOW QUALITY PROTEIN: phosphatidylinositol-binding clathrin assembly protein	0	0	0	0	0	0	0.0947138	0.0315713	0.00024344	0.0742349	down	0.00024344	-12.0041		66.4672	68.6035	0.968861	0.939966	-0.0456384
513203927	XP_414209.4	PIEZO1	PIEZO1	9780	LOW QUALITY PROTEIN: piezo-type mechanosensitive ion channel component 1	0	0	0	0	0	0	0.0658351	0.021945	0.000350188	0.0760429	down	0.000350188	-11.4796		116.431	109.862	1.0598	0.949005	0.0837861
54111425	NP_001005618.1	PLOD1	PLOD1	5351	procollagen-lysine,2-oxoglutarate 5-dioxygenase 1 precursor	0	0	0	0	0.0365807	0	0	0.0121936	0.000630065	0.0775119	down	0.000630065	-10.6322		43.5879	40.8368	1.06737	0.919794	0.0940597
513199419	XP_004943367.1	PLOD2	PLOD2	5352	procollagen-lysine,2-oxoglutarate 5-dioxygenase 2	0	0	0	0	0	0.0338692	0	0.0112897	0.000680472	0.0775569	down	0.000680472	-10.5212		68.1764	56.8229	1.19981	0.762456	0.262801
45383311	NP_989758.1	POFUT1	POFUT1	23509	GDP-fucose protein O-fucosyltransferase 1 precursor	0	0	0	0	0	0	0.0321874	0.0107291	0.000716001	0.0777569	down	0.000716001	-10.4477		21.7742	17.7075	1.22966	0.477644	0.298256
513220313	XP_004947591.1	PPCS	PPCS	79717	phosphopantothenate--cysteine ligase	0	0	0	0	0	0	0.031523	0.0105077	0.000731081	0.0783809	down	0.000731081	-10.4177		18.0246	15.5217	1.16125	0.721142	0.215682
261490820	NP_001159798.1	PPIA	PPIA	5478	peptidyl-prolyl cis-trans isomerase A	0.0915013	0.0336351	0.0357994	0.0536453	0.180528	0	0.0310582	0.0705287	0.760643	0.34534	down	0.760643	-0.394709		995.187	894.102	1.11306	0.872768	0.154528
118102574	XP_418054.2	PRELP	PRELP	5549	prolargin	0	0.0660355	0.105425	0.0571534	0.177079	0.0348935	0.0611643	0.0910455	0.627777	0.209743	down	0.627777	-0.671677		158.189	123.886	1.27689	0.617437	0.352629
57529899	NP_001006491.1	PSMA3	PSMA3	5684	proteasome subunit alpha type-3	0	0	0	0	0	0	0.0312489	0.0104163	0.000737489	0.0781319	down	0.000737489	-10.4051		156.149	143.298	1.08968	0.864711	0.123907
71896363	NP_001026106.1	PTBP1	PTBP1	5725	polypyrimidine tract-binding protein 1	0	0	0	0	0	0.0749994	0	0.0249998	0.000307411	0.0751279	down	0.000307411	-11.6675		70.4716	72.3779	0.973662	0.9518	-0.0385071
45384484	NP_990315.1	PXN	PXN	5829	paxillin	0	0	0.0350523	0.0116841	0	0.0348121	0.0303892	0.0217338	0.537765	0.114805	down	0.537765	-0.894953		61.2896	73.6788	0.831849	0.491978	-0.265606
57529509	NP_001006566.1	QDPR	QDPR	5860	dihydropteridine reductase	0	0	0	0	0	0	0.060678	0.020226	0.000379939	0.0761819	down	0.000379939	-11.3619		40.9071	33.2635	1.22979	0.491995	0.298413
45382561	NP_990559.1	RAB2A	RAB2A	5862	ras-related protein Rab-2A	0	0	0	0	0	0.0368612	0	0.0122871	0.000625273	0.0778039	down	0.000625273	-10.6432		241.322	223.817	1.07821	0.886586	0.108641
45382339	NP_990183.1	RBBP4	RBBP4	5928	histone-binding protein RBBP4	0	0	0	0	0.0724863	0	0	0.0241621	0.000318066	0.0756309	down	0.000318066	-11.6184		76.1421	84.0354	0.906072	0.790866	-0.142303
71897051	NP_001026518.1	RBM3	RBM3	5935	cold-inducible RNA-binding protein	0	0	0	0	0.035916	0	0	0.011972	0.000641717	0.0782899	down	0.000641717	-10.6058		247.454	230.36	1.0742	0.922272	0.103269
45382077	NP_990082.1	RDX	RDX	5962	radixin	0	0.0350262	0.0745715	0.0365326	0.0751809	0	0.162758	0.0793128	0.460666	0.130786	down	0.460666	-1.11821		61.5805	84.1631	0.73168	0.173504	-0.450714
45384350	NP_990653.1	RPLP1	RPLP1	6176	60S acidic ribosomal protein P1	0	0	0.0367748	0.0122583	0	0	0	0	1595.56	0.0779669	up	1595.56	10.6398		1592.2	1298.14	1.22653	0.661135	0.294585
381342486	NP_001244226.1	RPS10	RPS10	6204	40S ribosomal protein S10	0	0	0	0	0	0	0.0296918	0.00989726	0.000776135	0.0781849	down	0.000776135	-10.3314		1340.31	1184.78	1.13127	0.836165	0.177949
45382615	NP_990793.1	RPS15	RPS15	6209	40S ribosomal protein S15	0	0	0	0	0.0379455	0	0	0.0126485	0.000607416	0.0788809	down	0.000607416	-10.685		1143.58	703.847	1.62475	0.17526	0.700222
308081909	NP_001007824.1	RPSA	RPSA	3921	40S ribosomal protein SA	0.0316021	0	0	0.010534	0	0	0	0	1371.27	0.0780829	up	1371.27	10.4213		773.414	781.534	0.98961	0.980132	-0.0150677
383087734	NP_001244275.1	RRBP1	RRBP1	6238	ribosome-binding protein 1	0	0	0.102792	0.0342642	0	0	0	0	4458.08	0.0732369	up	4458.08	12.1222		38.9191	29.3551	1.3258	0.331653	0.406865
45384028	NP_990497.1	S100A11	S100A11	6282	protein S100-A11	0.0604629	0.100087	0.0710066	0.0771856	0.0715368	0.0352554	0.0307783	0.0458568	1.68307	0.0967859	up	1.68307	0.751097		826.768	843.846	0.979761	0.96375	-0.029498
118093380	XP_421903.2	SDPR	CAVIN2	8436	serum deprivation-response protein	0.0301189	0.0332321	0.0707521	0.044701	0.0356165	0.070289	0	0.0353018	1.26619	0.291535	up	1.26619	0.3405		583.815	554.939	1.05204	0.959256	0.0731838
71895247	NP_001026437.1	SEC22B	SEC22B	9554	vesicle-trafficking protein SEC22b precursor	0	0	0	0	0.0364529	0	0	0.012151	0.000632272	0.0779329	down	0.000632272	-10.6272		54.7311	47.1039	1.16192	0.674535	0.216513
71896825	NP_001026464.1	SERBP1	SERBP1	26135	plasminogen activator inhibitor 1 RNA-binding protein	0	0	0	0	0	0	0.0637405	0.0212468	0.000361692	0.0760519	down	0.000361692	-11.433		377.745	335.799	1.12491	0.817738	0.169815
45384240	NP_990622.1	SERPINH1	SERPINH1	871	serpin H1 precursor	0	0.0959225	0.136117	0.0773466	0.0685591	0.0676278	0.118715	0.0849674	0.910317	0.410226	down	0.910317	-0.135559		449.616	415.815	1.08129	0.923888	0.112751
513192517	XP_421625.4	SORBS1	SORBS1	10580	sorbin and SH3 domain-containing protein 1	0	0	0	0	0	0	0.0325791	0.0108597	0.000707398	0.0776839	down	0.000707398	-10.4652		24.983	28.1934	0.886129	0.740063	-0.174412
513183874	XP_004936034.1	SORBS2	SORBS2	8470	sorbin and SH3 domain-containing protein 2	0	0	0.0353266	0.0117755	0	0	0	0	1532.76	0.0773259	up	1532.76	10.5819		11.7004	12.5581	0.931705	0.864621	-0.102056
110227609	NP_001036003.1	SPTAN1	SPTAN1	6709	spectrin alpha chain, non-erythrocytic 1	0	0.0322677	0.17177	0.0680125	0.138473	0	0.209854	0.116109	0.585791	0.167094	down	0.585791	-0.771542		62.9439	69.4139	0.90679	0.840978	-0.141159
313661476	NP_001186354.1	SPTBN1	SPTBN1	6711	spectrin beta chain, brain 1	0	0.205129	0.218302	0.141144	0.330211	0.0723263	0.317796	0.240111	0.58784	0.11023	down	0.58784	-0.766505		180.281	175.891	1.02495	0.987153	0.0355602
513175471	XP_004935478.1	STRN	STRN	6801	striatin	0	0	0	0	0	0	0.0651359	0.021712	0.000353946	0.0756789	down	0.000353946	-11.4642		18.283	32.8854	0.555962	0.00025676	-0.846941
123959728	NP_001074186.1	SUMO2	SUMO2	6613	small ubiquitin-related modifier 2 precursor	0.0318571	0	0	0.010619	0	0.0371562	0	0.0123854	0.857472	0.422319	down	0.857472	-0.221838		186.313	169.138	1.10154	0.84119	0.139525
118405182	NP_001072966.1	SUMO3	SUMO3	6612	small ubiquitin-related modifier 3 precursor	0.031673	0	0	0.0105577	0	0.0369414	0	0.0123138	0.857476	0.421449	down	0.857476	-0.221832		140.812	135.433	1.03972	0.952933	0.0561916
45382783	NP_990825.1	TAGLN	TAGLN	6876	transgelin	0.0621678	0	0	0.0207226	0.110356	0.0362501	0.0316524	0.0594196	0.348834	0.0673039	down	0.348834	-1.51939		95.9062	127.502	0.752195	0.505248	-0.410821
363747068	XP_003643901.1	TAGLN2	TAGLN2	8407	LOW QUALITY PROTEIN: transgelin-2-like	0.0582779	0	0.0342144	0.0308308	0.0689512	0.0339804	0.0894574	0.0641297	0.480819	0.0582999	down	0.480819	-1.05643		301.998	320.9	0.941095	0.916942	-0.0875871
45385813	NP_990635.1	TF	TF	7018	ovotransferrin precursor	0.0929275	0	0	0.0309758	0	0	0.12689	0.0422966	0.732397	0.352517	down	0.732397	-0.449303		289.794	241.899	1.198	0.849341	0.260622
45383476	NP_989670.1	TGFBR3	TGFBR3	7049	transforming growth factor beta receptor type 3 precursor	0	0	0	0	0	0	0.0628828	0.0209609	0.000366623	0.0760829	down	0.000366623	-11.4134		84.8957	82.4744	1.02936	0.977659	0.0417441
513197566	XP_004936740.1	TIE1	TIE1	7075	tyrosine-protein kinase receptor Tie-1	0	0	0	0	0.0370876	0	0	0.0123625	0.000621459	0.0778589	down	0.000621459	-10.6521		54.2686	82.6305	0.656761	0.063216	-0.606559
45383127	NP_989854.1	TLN1	TLN1	7094	talin-1	0.120425	0.0332116	0.10607	0.086569	0.0356138	0.035126	0.123386	0.0647085	1.33779	0.233937	up	1.33779	0.419853		65.9918	67.4226	0.97878	0.963986	-0.0309441
50756490	XP_415183.1	TMEM119	TMEM119	338773	transmembrane protein 119	0	0	0.0376417	0.0125472	0	0	0	0	1633.15	0.0781819	up	1633.15	10.6734		457.927	397.332	1.1525	0.825372	0.204771
55741612	NP_001006235.1	TMPO	TMPO	7112	lamina-associated polypeptide 2,	0	0	0.037743	0.012581	0	0.037486	0	0.0124953	1.00685	0.496745	up	1.00685	0.00985464		38.7421	35.4215	1.09374	0.860196	0.129275
513218345	XP_004947191.1	TNFRSF6B	TNFRSF6B	8771	tumor necrosis factor receptor superfamily member 6B	0	0	0	0	0	0.0745118	0	0.0248373	0.000309422	0.0753579	down	0.000309422	-11.6581		6.53401	6.74158	0.969212	0.983813	-0.0451165
45382323	NP_990732.1	TPM1	TPM1	7168	tropomyosin alpha-1 chain	0.032142	0.0354641	0.113279	0.0602951	0.0380287	0	0.0327573	0.0235953	2.55487	0.0842119	up	2.55487	1.35325		99.5928	119.047	0.836587	0.736211	-0.257412
350537089	NP_001232856.1	TPM3	TPM3	7170	tropomyosin alpha-3 chain	0.0311044	0.0686542	0.109606	0.069788	0.0367833	0.0362781	0.0955184	0.0561933	1.2419	0.304706	up	1.2419	0.312544		61.7106	66.2274	0.931798	0.918866	-0.10191
477507185	NP_001264377.1	TSTA3	TSTA3	7264	GDP-L-fucose synthase	0	0	0	0	0	0	0.0312975	0.0104325	0.000736344	0.0784259	down	0.000736344	-10.4073		13.1267	12.8923	1.01818	0.990642	0.0259977
45382053	NP_990784.1	TXN	TXN	7295	thioredoxin	0.0583235	0	0	0.0194412	0	0	0.0296804	0.00989346	1.9643	0.245465	up	1.9643	0.974018		287.794	300.06	0.95912	0.953889	-0.0602164
71896747	NP_001026310.1	USO1	USO1	8615	general vesicular transport factor p115	0	0	0	0	0.0748298	0	0	0.0249433	0.000308108	0.0752409	down	0.000308108	-11.6643		63.6674	59.9172	1.06259	0.923792	0.0875838
124249428	NP_001074338.1	VAPA	VAPA	9218	vesicle-associated membrane protein-associated protein A	0	0	0	0	0	0	0.0309594	0.0103198	0.00074438	0.0785829	down	0.00074438	-10.3917		20.6113	18.9769	1.08613	0.869738	0.11919
57529406	NP_001006296.1	VAPB	VAPB	9217	VAMP (vesicle-associated membrane protein)-associated protein B and C	0	0	0	0	0	0	0.0298512	0.0099504	0.000771993	0.0783189	down	0.000771993	-10.3391		85.9213	84.1347	1.02124	0.983813	0.0303155
45382123	NP_990772.1	VCL	VCL	7414	vinculin	0.0644712	0	0.0757158	0.046729	0.0762818	0.0752221	0.0659122	0.072472	0.644824	0.0819649	down	0.644824	-0.633022		57.4945	65.6491	0.875786	0.721935	-0.19135
114326309	NP_001041541.1	VIM	VIM	7431	vimentin	0.999992	0.999992	0.843757	0.947914	0.999992	0.839959	0.673927	0.83796	1.13122	0.358493	up	1.13122	0.177874		3648.64	3544.28	1.02944	0.986235	0.0418644
118082572	XP_425454.2	WBP11	WBP11	51729	WW domain-binding protein 11	0	0	0	0	0	0.0362758	0	0.0120919	0.000635357	0.0773069	down	0.000635357	-10.6201		16.7491	17.3423	0.965793	0.925778	-0.0502144
52138693	NP_001004402.1	WDR1	WDR1	9948	WD repeat-containing protein 1	0.0640675	0	0	0.0213558	0.075803	0	0	0.0252677	0.845231	0.414356	down	0.845231	-0.242583		99.9583	103.283	0.967811	0.943052	-0.0472026
45383329	NP_989745.1	YBX1	YBX1	4904	nuclease-sensitive element-binding protein 1	0	0	0.0757139	0.025238	0	0	0	0	3283.95	0.0752069	up	3283.95	11.6812		625.925	525.023	1.19219	0.724774	0.25361
55741594	NP_001006415.1	YWHAQ	YWHAQ	10971	14-3-3 protein theta	0	0.0348312	0.0370717	0.0239677	0.037332	0	0.0969454	0.0447592	0.53556	0.182567	down	0.53556	-0.900879		421.749	435.492	0.968443	0.945851	-0.0462602
71897035	NP_001026514.1	YWHAZ	YWHAZ	7534	14-3-3 protein zeta	0.031383	0.0346264	0.0368538	0.0342877	0.0371123	0.0732393	0.128583	0.0796448	0.430563	0.0669849	down	0.430563	-1.21571		263.709	309.17	0.852961	0.687956	-0.229449
Non-diferential proteins (P ≤ 0.05) with NO matching identification by RNA-seq (8 proteins)
94536813	NP_001001876.1	HSPG2	HSPG2	3339	basement membrane-specific heparan sulfate proteoglycan core protein precursor	0.387733	0.296228	0.385236	0.356399	0.49463	0.348293	0.7041	0.515674	0.691136	0.187352	down	0.691136	-0.532958
71896919	NP_001025924.1	H2AFJ	H2AFJ	55766	histone H2A.J	0.0311939	0.103286	0.0732759	0.0692518	0	0.0727973	0.0317694	0.0348556	1.98661	0.0808479	up	1.98661	0.990305
71895559	NP_001026652.1	HIST1H2B8	HIST2H2BE	8349	histone H2B 8	0.0636888	0.0702799	0.0747957	0.0695882	0.0753567	0.0371378	0.130462	0.0809854	0.859281	0.359529	down	0.859281	-0.218798
95772094	NP_001035732.1	HIST1H101	HIST1H1D	3007	histone H1.01	0	0	0.0732298	0.0244099	0	0	0.0317485	0.0105828	2.30561	0.213103	up	2.30561	1.20515
118405202	NP_001072943.1	HIST1H2A4	HIST2H2AC	8338	histone H2A-IV	0.0297105	0.0983667	0.0697916	0.0659563	0	0.0693349	0.0302475	0.0331941	1.98676	0.0805439	up	1.98676	0.990416
126165286	NP_001075166.1	CALML3	CALML3	810	calmodulin, striated muscle	0.0319828	0	0.0375586	0.0231805	0.0378221	0.0373032	0	0.0250418	0.925695	0.419105	down	0.925695	-0.111392
475504775	NP_001264297.1	HIST1H110	HIST1H1D	3007	histone H1.10	0	0	0.0716794	0.0238931	0	0	0.0310713	0.0103571	2.30596	0.211505	up	2.30596	1.20537
45383816	NP_989479.1	S100A6	S100A6	6277	protein S100-A6	0	0	0.036245	0.0120817	0.0730434	0	0.0314308	0.0348247	0.347071	0.0930749	down	0.347071	-1.5267
45383077	NP_989880.1	MIR1248	MIR1248	100302143	eukaryotic initiation factor 4A-II	0	0	0	0	0.0755673	0	0	0.0251891	0.000305101	0.0754949	down	0.000305101	-11.6784
45383033	NP_989904.1	FLNC	FLNC	2318	filamin-C	0	0	0.074927	0.0249757	0	0.0372145	0.0324898	0.0232348	1.0749	0.460808	up	1.0749	0.104205
45384534	NP_990331.1	MMP27	MMP27	64066	matrix metalloproteinase-27 precursor	0	0	0	0	0.0374785	0	0	0.0124928	0.000614981	0.0781059	down	0.000614981	-10.6672
46048687	NP_990654.1	ACTN2	ACTN2	88	alpha-actinin-2	0	0	0.0356684	0.0118895	0	0	0	0	1547.58	0.0778949	up	1547.58	10.5958
513202182	XP_001232765.3	CTSH	CTSH	1512	pro-cathepsin H	0	0	0	0	0	0	0.0593691	0.0197897	0.000388313	0.0765239	down	0.000388313	-11.3305
363727758	XP_003640418.1	HIST1H46L4	HIST1H4I	8294	histone H4-like	0.029887	0.131951	0.140425	0.100755	0.10614	0.244201	0.061118	0.137153	0.734629	0.266743	down	0.734629	-0.444912
50803534	XP_424279.1	ACTBL2	ACTBL2	345651	actin, alpha skeletal muscle B	0.125703	0.104035	0.147627	0.125788	0.14884	0.220147	0.161056	0.176681	0.711963	0.176671	down	0.711963	-0.490127
118082574	XP_425455.2	HIST1H2A3	HIST2H2AC	8338	histone H2A-IV	0.0308247	0.102063	0.0724087	0.0684322	0	0.0719355	0.0313906	0.034442	1.98666	0.0812439	up	1.98666	0.990345

## Sheet: Table 6
Additional file 3: Table S6. List of enriched pathways, obtained using Ingenuity sofware and the MS diferential proteins (P ≤ 0.05).
MS pathway analysis, © 2000-2017 QIAGEN. All rights reserved.
	Overlap P value
Ingenuity Canonical Pathways	-log(p-value)**	Ratio*	z-score***	Molecules
Glycolysis I	6.34	0.167	NS	PGK1,ENO1,TPI1,GAPDH
Gluconeogenesis I	6.26	0.16	NS	PGK1,ENO1,GAPDH,MDH1
Caveolar-mediated Endocytosis Signaling	5.9	0.0704	NS	ARCN1,FLNA,ACTC1,CAVIN1,ACTA1
Intrinsic Prothrombin Activation Pathway	5.37	0.0976	1	FGB,COL18A1,FGA,COL3A1
Extrinsic Prothrombin Activation Pathway	3.09	0.125	NS	FGB,FGA
Hepatic Fibrosis / Hepatic Stellate Cell Activation	2.86	0.0221	NS	COL6A1,COL12A1,COL18A1,COL3A1
Regulation of Actin-based Motility by Rho	2.8	0.0349	NS	GSN,ACTC1,ACTA1
Clathrin-mediated Endocytosis Signaling	2.72	0.0202	NS	HSPA8,APOB,ACTC1,ACTA1
VEGF Signaling	2.62	0.03	NS	YWHAE,ACTC1,ACTA1
Virus Entry via Endocytic Pathways	2.59	0.0294	NS	FLNA,ACTC1,ACTA1
Actin Cytoskeleton Signaling	2.55	0.0181	0	FLNA,GSN,ACTC1,ACTA1
Coagulation System	2.41	0.0571	NS	FGB,FGA
LXR/RXR Activation	2.38	0.0248	NS	C4A/C4B,APOB,FGA
Atherosclerosis Signaling	2.35	0.0242	NS	APOB,COL18A1,COL3A1
FXR/RXR Activation	2.34	0.024	NS	C4A/C4B,APOB,FGA
Mechanisms of Viral Exit from Host Cells	2.27	0.0488	NS	ACTC1,ACTA1
NADH Repair	2.1	0.333	NS	GAPDH
eNOS Signaling	2.04	0.0186	NS	HSPA8,HSP90AA1,HSPA5
Unfolded protein response	2.04	0.037	NS	HSPA8,HSPA5
Tight Junction Signaling	2	0.0181	NS	EPB41,ACTC1,ACTA1
Aldosterone Signaling in Epithelial Cells	2	0.018	NS	HSPA8,HSP90AA1,HSPA5
Acute Phase Response Signaling	1.98	0.0178	NS	C4A/C4B,FGB,FGA
Germ Cell-Sertoli Cell Junction Signaling	1.98	0.0178	NS	GSN,ACTC1,ACTA1
Calcium Signaling	1.97	0.0175	NS	TPM2,ACTC1,ACTA1
Sertoli Cell-Sertoli Cell Junction Signaling	1.96	0.0173	NS	EPB41,ACTC1,ACTA1
Remodeling of Epithelial Adherens Junctions	1.87	0.0303	NS	ACTC1,ACTA1
Agrin Interactions at Neuromuscular Junction	1.86	0.0299	NS	ACTC1,ACTA1
ILK Signaling	1.83	0.0156	NS	FLNA,ACTC1,ACTA1
MSP-RON Signaling Pathway	1.8	0.0278	NS	ACTC1,ACTA1
Aspartate Degradation II	1.73	0.143	NS	MDH1
EIF2 Signaling	1.72	0.0142	NS	HSPA5,ACTC1,ACTA1
Integrin Signaling	1.72	0.0142	NS	GSN,ACTC1,ACTA1
Sucrose Degradation V (Mammalian)	1.67	0.125	NS	TPI1
Crosstalk between Dendritic Cells and Natural Killer Cells	1.63	0.0225	NS	ACTC1,ACTA1
Prostanoid Biosynthesis	1.62	0.111	NS	PTGDS
Death Receptor Signaling	1.6	0.0217	NS	ACTC1,ACTA1
Fcγ Receptor-mediated Phagocytosis in Macrophages and Monocytes	1.59	0.0215	NS	ACTC1,ACTA1
Huntington's Disease Signaling	1.58	0.0125	NS	TGM2,HSPA8,HSPA5
TR/RXR Activation	1.55	0.0204	NS	ENO1,FGA
FAK Signaling	1.55	0.0204	NS	ACTC1,ACTA1
Protein Ubiquitination Pathway	1.48	0.0114	NS	HSPA8,HSP90AA1,HSPA5
Paxillin Signaling	1.46	0.0182	NS	ACTC1,ACTA1
Glucocorticoid Receptor Signaling	1.39	0.0105	NS	HSPA8,HSP90AA1,HSPA5
Role of Tissue Factor in Cancer	1.39	0.0167	NS	FGB,FGA
RhoA Signaling	1.38	0.0164	NS	ACTC1,ACTA1
PI3K/AKT Signaling	1.37	0.0163	NS	YWHAE,HSP90AA1
Granzyme A Signaling	1.35	0.0588	NS	H1F0
Cellular Effects of Sildenafil (Viagra)	1.35	0.0159	NS	ACTC1,ACTA1
Adipogenesis pathway	1.31	0.0152	NS	PLIN1,FABP4
*Ratio measures the overlap, meaning the ratio between the differential transcripts and the total number of transcripts implicated in the pathway (e.g.: 0.1 means that 10% of the genes the pathway are diferential).
**The overlap P value indicates whether there is a statistically significant overlap between the dataset's transcripts and the transcripts that are differentially expressed (calculated using Fisher’s Exact Test; significance is attributed to P values < 0.01).
***Z‐score indicates the activation states of the pathway, determined taking into account both the up or down regulation of the differential transcripts and information from the literature about the role of these gene products in the pathway (inhibition or activation).																				RNA=seq analysis
NS= none significant																		2.61155		10.3475	20.0171	0.516936	0.091954	-0.951943
B. List of proteins involved in the Intrinsic Prothrombin Activation Pathway: details on their expression at the protein and mRNA levels						Spec analysisMass												12.9408		20.0746	39.937	0.502657	0.00213551	-0.992354
Protein GI	Genbank Accession	Chicken symbol	Human symbol	GeneID (human)	Protein Description	Broiler B7 Normalized Intensity	Broiler B6 Normalized Intensity	Broiler B5 Normalized Intensity	Mean Broilers	Layer L2 Normalized Intensity	Layer L4 Normalized Intensity	Layer L1 Normalized Intensity	Mean Layers	Ratio (B/L)	P-value	Direction in Broilers	Ratio Broilers / Layers	1.4151		40.1829	51.1179	0.786083	0.417204	-0.347246
429484492	NP_990687.2	FGA	FGA	2243	fibrinogen alpha chain	0.0950997	0.104948	0.223387	0.141145	0	0.0369805	0.032284	0.0230882	6.1133	0.00922199	up	6.1116	-3.80294		2001.01	1271.21	1.5741	0.598612	0.654529
267844833	NP_001161155.1	FGB	FGB	2244	fibrinogen beta chain precursor	0	0.106067	0.0752487	0.0604384	0	0	0	0	7862.83	0.00535999	up	7862.83
45383788	NP_989495.1	COL18A1	COL18A1	80781	collagen, type XVIII, alpha 1 precursor	0.0583258	0.0321724	0.0684968	0.0529983	0	0	0.0596062	0.0198687	2.66742	0.019003	up	2.66678
206597436	NP_990711.2	COL3A1	COL3A1	1281	collagen alpha-1(III) chain precursor	0	0	0.0728828	0.0242943	0.477642	0.253555	0.286342	0.339179	0.0716266	0.000903999	down	0.0716476
